# Supplementary material
Source: PubMed Central journal article supplement (PMC3907775)

Supporting Information

**A Simple Method for the Electrophilic Cyanation of  
Secondary Amines**

Chen Zhu, Ji-Bao Xia and Chuo Chen\*

*Division of Chemistry, Department of Biochemistry, The University of Texas Southwestern  
Medical Center, Dallas, USA*

Email: [Chuo.Chen@UTSouthwestern.edu](mailto:Chuo.Chen@UTSouthwestern.edu)

**Table of Contents**

|                                                   |         |
|---------------------------------------------------|---------|
| 1. General Information                            | S2      |
| 2. General Procedures                             | S2      |
| 3. Compound Characterization                      | S3–S7   |
| 4. Crystallographic Data of <b>5</b>              | S8–20   |
| 5. <sup>1</sup> H and <sup>13</sup> C NMR Spectra | S21–S36 |

## 1. General Information

All reactions were performed in glassware without argon protection. Commercially available reagents were used without further purification. Organic solutions were concentrated by rotary evaporator at ca. 30 mmHg. Flash column chromatography was performed as described by Still (Still, W. C.; Kahn, M.; Mitra, A. *J. Org. Chem.* **1978**, *43*, 2923), employing EMD silica gel 60 (230–400 mesh ASTM). TLC analyses were performed on EMD 250  $\mu\text{m}$  Silica Gel 60 F<sub>254</sub> plates and visualized by quenching of UV fluorescence ( $\lambda_{\text{max}} = 254 \text{ nm}$ ), or by staining ceric ammonium molybdate.  $^1\text{H}$  and  $^{13}\text{C}$  NMR spectra were recorded on a Varian Inova-500 or Inova-400. Chemical shifts for  $^1\text{H}$  and  $^{13}\text{C}$  NMR spectra are reported in ppm ( $\delta$ ) relative to the  $^1\text{H}$  and  $^{13}\text{C}$  signals in the solvent ( $\text{CDCl}_3$ : 7.26, 77.00 ppm;  $\text{C}_6\text{D}_6$ :  $\delta$  7.16, 128.06 ppm;  $\text{CD}_3\text{CN}$ :  $\delta$  1.94 ppm) and the multiplicities are presented as follows: s = singlet, d = doublet, t = triplet, q = quartet, hept = heptet, m = multiplet. Mass spectra were acquired on an Agilent 1200 LC-MS or VG 70-VSE. Data collection on 70-VSE (purchased in part with a grant from the Division of Research Resources, National Institutes of Health RR 04648) was serviced by the Mass Spectrometry Laboratory at the University of Illinois at Urbana-Champaign.

## 2. General Procedures

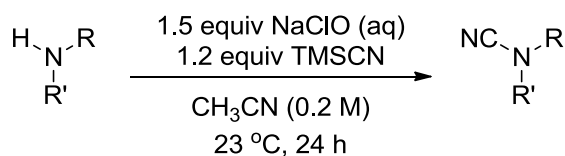

Secondary amine (0.2 mmol) was loaded in a reaction vial. Acetonitrile (1 mL) followed by TMSCN (0.24 mmol, 30  $\mu\text{L}$ ) were syringed into the mixture. Afterwards, bleach (0.3 mmol,  $\sim$  200  $\mu\text{L}$ ) were added dropwise to the reaction which was then stirred at rt for 4 h or until the starting material had been consumed as determined by TLC. The reaction was extracted with 3 x 10 mL EtOAc. The organic layer was combined and washed with 5 mL  $\text{H}_2\text{O}$  and 5 mL brine.

After drying with anhydrous  $\text{Na}_2\text{SO}_4$  and concentration, the residue was purified by column chromatography to give product.

### 3. Compound Characterization

#### Compound 2

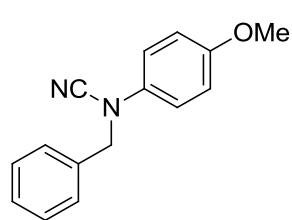

Yield 70%.  $^1\text{H}$  NMR (400 MHz,  $\text{CDCl}_3$ )  $\delta$  3.75 (s, 3H), 4.71 (s, 2H), 6.82-6.86 (m, 2H), 7.02-7.06 (m, 2H), 7.30-7.37 (m, 5H);  $^{13}\text{C}$  NMR (100 MHz,  $\text{CDCl}_3$ )  $\delta$  54.6, 55.5, 114.7, 114.8, 118.3, 127.5, 128.5, 129.0, 133.1, 134.5, 156.3. MS (ESI) $^+$  calcd for  $\text{C}_{15}\text{H}_{15}\text{N}_2\text{O}$  (M+H) $^+$

239.1, found 239.1.

#### Compound 3

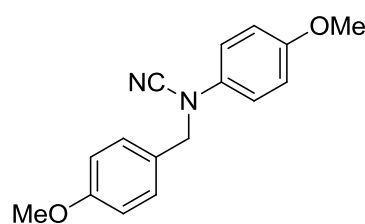

Yield 70%.  $^1\text{H}$  NMR (400 MHz,  $\text{CDCl}_3$ )  $\delta$  3.75 (s, 3H), 3.78 (s, 3H), 4.62 (s, 2H), 6.82-6.86 (m, 2H), 6.86-6.90 (m, 2H), 7.01-7.06 (m, 2H), 7.23-7.28 (m, 2H);  $^{13}\text{C}$  NMR (100 MHz,  $\text{CDCl}_3$ )  $\delta$  54.2, 55.3, 55.5, 114.3, 114.8, 118.5, 126.3, 129.2, 133.2, 156.3, 159.7.

MS (ESI) $^+$  calcd for  $\text{C}_{16}\text{H}_{16}\text{N}_2\text{O}_2\text{Na}$  (M+Na) $^+$  291.1, found 291.1.

#### Compound 4

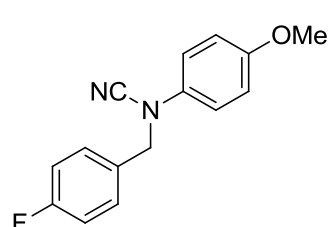

Yield 67%.  $^1\text{H}$  NMR (400 MHz,  $\text{CDCl}_3$ )  $\delta$  3.75 (s, 3H), 4.66 (s, 2H), 6.82-6.87 (m, 2H), 7.00-7.07 (m, 4H), 7.26-7.34 (m, 2H);  $^{13}\text{C}$  NMR (100 MHz,  $\text{CDCl}_3$ )  $\delta$  54.1, 55.5, 114.6, 114.9, 116.0 (d,  $J_{\text{C-F}} = 21.7$  Hz), 118.5, 129.5 (d,  $J_{\text{C-F}} = 8.3$  Hz), 130.2 (d,  $J_{\text{C-F}} = 3.1$  Hz), 132.9,

156.4, 162.7 (d,  $J_{\text{C-F}} = 246.2$  Hz). MS (ESI) $^+$  calcd for  $\text{C}_{15}\text{H}_{14}\text{FN}_2\text{O}$  (M+H) $^+$  257.1, found 257.2.

### Compound 5

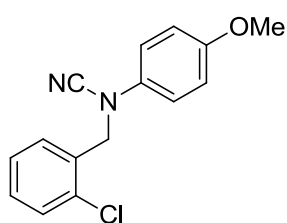

Yield 58%.  $^1\text{H}$  NMR (400 MHz,  $\text{CDCl}_3$ )  $\delta$  3.75 (s, 3H), 4.82 (s, 2H), 6.83-6.88 (m, 2H), 7.01-7.06 (m, 2H), 7.23-7.30 (m, 2H), 7.35-7.38 (m, 1H), 7.40-7.43 (m, 1H);  $^{13}\text{C}$  NMR (100 MHz,  $\text{CDCl}_3$ )  $\delta$  52.0, 55.5, 114.3, 114.9, 118.0, 127.3, 129.0, 129.8, 129.9, 131.8, 132.9, 133.3, 156.4. MS (ESI) $^+$  calcd for  $\text{C}_{15}\text{H}_{14}\text{ClN}_2\text{O}$  (M+H) $^+$  273.1, found 273.1.

### Compound 6

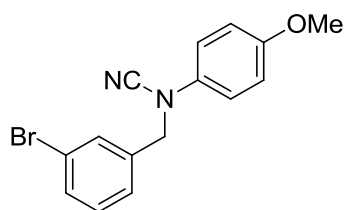

Yield 64%.  $^1\text{H}$  NMR (400 MHz,  $\text{CDCl}_3$ )  $\delta$  3.75 (s, 3H), 4.68 (s, 2H), 6.82-6.87 (m, 2H), 6.98-7.03 (m, 2H), 7.21-7.29 (m, 2H), 7.43-7.48 (m, 2H);  $^{13}\text{C}$  NMR (100 MHz,  $\text{CDCl}_3$ )  $\delta$  54.0, 55.6, 114.5, 114.9, 118.3, 123.1, 125.9, 130.4, 130.6, 131.7, 132.7, 136.8, 156.4. MS (ESI) $^+$  calcd for  $\text{C}_{15}\text{H}_{14}\text{BrN}_2\text{O}$  (M+H) $^+$  317.0, found 317.1.

### Compound 7

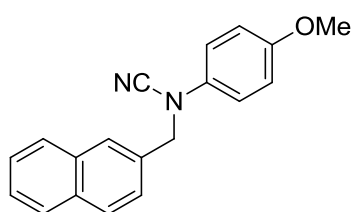

Yield 60%.  $^1\text{H}$  NMR (400 MHz,  $\text{CDCl}_3$ )  $\delta$  3.73 (s, 3H), 4.88 (s, 2H), 6.80-6.86 (m, 2H), 7.05-7.11 (m, 2H), 7.45 (dd,  $J = 1.6, 8.4$  Hz, 1H), 7.47-7.51 (m, 2H), 7.78 (s, 1H), 7.78-7.83 (m, 2H), 7.85 (d,  $J = 8.4$  Hz, 1H);  $^{13}\text{C}$  NMR (100 MHz,  $\text{CDCl}_3$ )  $\delta$  54.9, 55.5, 114.8, 114.9, 118.3, 124.8, 126.4, 126.5, 126.6, 127.8, 127.9, 129.0, 131.9, 133.0, 133.1, 133.2, 156.3. MS (ESI) $^+$  calcd for  $\text{C}_{19}\text{H}_{17}\text{N}_2\text{O}$  (M+H) $^+$  289.1, found 289.2.

### Compound 8

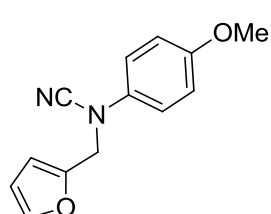

Yield 69%.  $^1\text{H}$  NMR (400 MHz,  $\text{CDCl}_3$ )  $\delta$  3.76 (s, 3H), 4.64 (s, 2H), 6.34 (dd,  $J = 2.0, 3.2$  Hz, 1H), 6.39 (dd,  $J = 0.8, 3.2$  Hz, 1H), 6.84-6.89 (m, 2H), 7.08-7.13 (m, 2H), 7.41 (dd,  $J = 0.8, 2.0$  Hz, 1H);  $^{13}\text{C}$  NMR (100

MHz, CDCl<sub>3</sub>) δ 47.8, 55.5, 110.3, 110.7, 114.3, 114.8, 118.8, 132.9, 143.4, 147.8, 156.6. MS (ESI)<sup>+</sup> calcd for C<sub>13</sub>H<sub>13</sub>N<sub>2</sub>O<sub>2</sub> (M+H)<sup>+</sup> 229.1, found 229.1.

### Compound 9

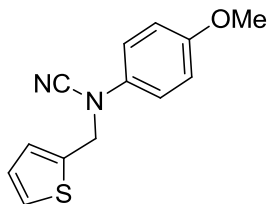

Yield 71%. <sup>1</sup>H NMR (400 MHz, CDCl<sub>3</sub>) δ 3.76 (s, 3H), 4.84 (s, 2H), 6.84-6.88 (m, 2H), 6.97 (dd, *J* = 3.6, 5.2 Hz, 2H), 7.05-7.10 (m, 3H), 7.28 (dd, *J* = 3.6, 5.2 Hz, 2H); <sup>13</sup>C NMR (100 MHz, CDCl<sub>3</sub>) δ 49.9, 55.5, 114.3, 114.9, 119.1, 126.6, 127.2, 127.8, 132.7, 136.3, 156.6. MS (ESI)<sup>+</sup> calcd for C<sub>13</sub>H<sub>13</sub>N<sub>2</sub>OS (M+H)<sup>+</sup> 245.1, found 245.0.

### Compound 10

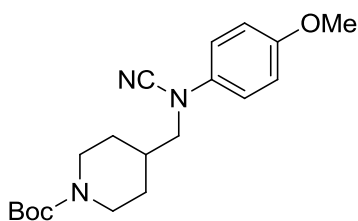

Yield 73%. <sup>1</sup>H NMR (400 MHz, CDCl<sub>3</sub>) δ 1.12-1.22 (m, 2H), 1.42 (s, 9H), 1.77 (d, *J* = 12.0 Hz, 2H), 1.90-2.00 (m, 1H), 2.66 (dd, *J* = 12.0, 12.0 Hz, 2H), 3.38 (d, *J* = 7.2 Hz, 2H), 3.76 (s, 3H), 4.11 (s, 2H), 6.82-6.92 (m, 2H), 7.00-7.10 (m, 2H); <sup>13</sup>C NMR (100 MHz, CDCl<sub>3</sub>) δ 28.4, 29.6, 35.0, 55.6, 55.9, 79.6, 114.7, 114.9, 118.2, 133.2, 154.6, 156.3. MS (ESI)<sup>+</sup> calcd for C<sub>19</sub>H<sub>28</sub>N<sub>3</sub>O<sub>3</sub> (M+H)<sup>+</sup> 346.2, found 346.3.

### Compound 11

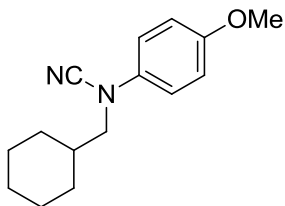

Yield 66%. <sup>1</sup>H NMR (400 MHz, CDCl<sub>3</sub>) δ 0.92-1.04 (m, 2H), 1.08-1.28 (m, 3H), 1.62-1.86 (m, 6H), 3.33 (d, *J* = 6.8 Hz, 2H), 3.77 (s, 3H), 6.85-6.89 (m, 2H), 7.01-7.05 (m, 2H); <sup>13</sup>C NMR (100 MHz, CDCl<sub>3</sub>) δ 25.5, 26.2, 30.6, 36.3, 55.6, 56.7, 114.8, 115.0, 118.0, 133.5, 156.0. MS (ESI)<sup>+</sup> calcd for C<sub>15</sub>H<sub>21</sub>N<sub>2</sub>O (M+H)<sup>+</sup> 245.1, found 245.2.

### Compound 12

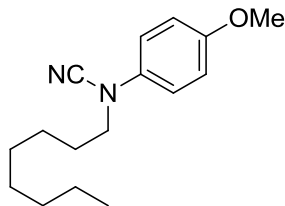

Yield 56%.  $^1\text{H}$  NMR (400 MHz,  $\text{CDCl}_3$ )  $\delta$  0.86 (t,  $J = 6.8$  Hz, 3H), 1.20-1.35 (m, 8H), 1.35-1.45 (m, 2H), 1.72-1.80 (m, 2H), 3.48 (t,  $J = 7.2$  Hz, 2H), 3.77 (s, 3H), 6.85-6.90 (m, 2H), 7.01-7.05 (m, 2H);  $^{13}\text{C}$  NMR (100 MHz,  $\text{CDCl}_3$ )  $\delta$  14.0, 22.6, 26.5, 27.5, 29.0, 29.1, 31.7, 50.3, 55.6, 114.5, 114.8, 118.0, 133.4, 156.1. MS (ESI) $^+$  calcd for  $\text{C}_{16}\text{H}_{25}\text{N}_2\text{O}$  (M+H) $^+$  261.2, found 261.2.

### Compound 13

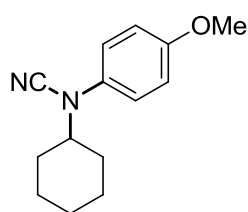

Yield 68%.  $^1\text{H}$  NMR (400 MHz,  $\text{CDCl}_3$ )  $\delta$  1.12-1.25 (m, 1H), 1.25-1.37 (m, 2H), 1.48-1.60 (m, 2H), 1.62-1.70 (m, 1H), 1.82-1.90 (m, 2H), 2.00-2.08 (m, 2H), 3.38 (tt,  $J = 4.0, 11.6$  Hz, 1H), 3.77 (s, 3H), 6.84-6.89 (m, 2H), 7.05-7.10 (m, 2H);  $^{13}\text{C}$  NMR (100 MHz,  $\text{CDCl}_3$ )  $\delta$  25.1, 25.2, 31.0, 55.5, 59.1, 113.7, 114.8, 120.2, 133.2, 156.6. MS (ESI) $^+$  calcd for  $\text{C}_{14}\text{H}_{19}\text{N}_2\text{O}$  (M+H) $^+$  231.1, found 231.2.

### Compound 14

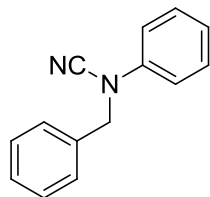

Yield 63%.  $^1\text{H}$  NMR (400 MHz,  $\text{CDCl}_3$ )  $\delta$  4.80 (s, 2H), 7.07-7.15 (m, 3H), 7.32-7.41 (m, 7H);  $^{13}\text{C}$  NMR (101 MHz,  $\text{CDCl}_3$ )  $\delta$  53.6, 113.8, 115.9, 123.6, 127.2, 128.4, 129.0, 129.5, 134.2, 139.7; MS (ESI) $^+$  calcd for  $\text{C}_{14}\text{H}_{12}\text{N}_2\text{Na}$  (M+Na) $^+$  231.1, found 231.1.

### Compound 15

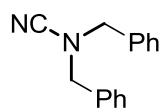

Yield 72%.  $^1\text{H}$  NMR (400 MHz,  $\text{CDCl}_3$ )  $\delta$  4.10 (s, 3H), 7.27-7.31 (m, 4H), 7.33-7.41 (m, 6H);  $^{13}\text{C}$  NMR (100 MHz,  $\text{CDCl}_3$ )  $\delta$  54.2, 118.3, 128.6, 128.7, 128.9, 134.3. MS (ESI) $^+$  calcd for  $\text{C}_{15}\text{H}_{15}\text{N}_2$  (M+H) $^+$  223.1, found 223.2.

### Compound 16

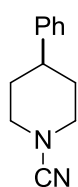

Yield 88%.  $^1\text{H}$  NMR (400 MHz,  $\text{CDCl}_3$ )  $\delta$  1.80-1.88 (m, 4H), 2.54-2.63 (m, 1H), 3.09-3.17 (m, 2H), 3.49-3.55 (m, 2H), 7.16-7.20 (m, 2H), 7.20-7.25 (m, 1H), 7.29-7.34 (m, 2H);  $^{13}\text{C}$  NMR (100 MHz,  $\text{CDCl}_3$ )  $\delta$  32.0, 41.3, 50.1, 118.3, 126.6, 126.8, 128.7, 144.5. MS (ESI) $^+$  calcd for  $\text{C}_{12}\text{H}_{15}\text{N}_2$  (M+H) $^+$  187.1, found 187.1.

### Compound 17

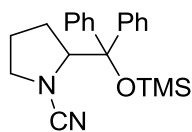

Yield 82%.  $^1\text{H}$  NMR (400 MHz,  $\text{CDCl}_3$ )  $\delta$  -0.15 (s, 9H), 0.63-0.73 (m, 1H), 1.45-1.55 (m, 1H), 1.82-1.92 (m, 1H), 2.03-2.13 (m, 1H), 2.75 (ddd,  $J = 5.2, 8.0, 9.2$  Hz, 1H), 3.18 (ddd,  $J = 7.6, 7.6, 9.2$  Hz, 1H), 4.75 (dd,  $J = 4.0, 9.2$  Hz, 1H), 7.30-7.38 (m, 6H), 7.40-7.48 (m, 4H);  $^{13}\text{C}$  NMR (100 MHz,  $\text{CDCl}_3$ )  $\delta$  1.65, 23.8, 27.9, 52.7, 68.3, 82.9, 118.3, 127.4, 127.7, 127.8, 127.9, 129.2, 129.4, 141.9, 142.0. MS (ESI) $^+$  calcd for  $\text{C}_{21}\text{H}_{27}\text{N}_2\text{OSi}$  (M+H) $^+$  351.2, found 351.2.

X-ray Experimental for  $C_{15}H_{13}N_2OCl$ : Crystals grew as colorless prisms by slow evaporation from a mixture of ethyl acetate and hexanes. The data crystal was cut from a larger crystal and had approximate dimensions; 0.24 x 0.17 x 0.14 mm. The data were collected at room temperature on a Rigaku R-Axis Spider diffractometer with an image plate detector using a graphite monochromator with  $CuK\alpha$  radiation ( $\lambda = 1.5418\text{\AA}$ ). A total of 191 images of data were collected using  $\omega$ -scans with a scan range of  $5^\circ$  and a counting time of 360 seconds per image. Details of crystal data, data collection and structure refinement are listed in Table 1. Data reduction were performed using the Rigaku Americas Corporation's Crystal Clear version 1.40.<sup>S1</sup> The structure was solved by direct methods using SIR97<sup>S2</sup> and refined by full-matrix least-squares on  $F^2$  with anisotropic displacement parameters for the non-H atoms using SHELXL-97.<sup>S3</sup> The absolute configuration was determined by the method of Flack.<sup>S4</sup> The Flack x parameter refined to 0.04(3). The assignment of absolute configuration was corroborated by the Hooft analysis.<sup>S5</sup> The Hooft y-parameter was determined to be 0.020(8). The hydrogen atoms were calculated in ideal positions with isotropic displacement parameters set to 1.2xUeq of the attached atom (1.5xUeq for methyl hydrogen atoms).

The function,  $\sum w(|F_o|^2 - |F_c|^2)^2$ , was minimized, where  $w = 1/[(\sigma(F_o))^2 + (0.0437*P)^2 + (0.9407*P)]$  and  $P = (|F_o|^2 + 2|F_c|^2)/3$ .  $R_w(F^2)$  refined to 0.166, with  $R(F)$  equal to 0.0926 and a goodness of fit,  $S$ , = 1.1257. Definitions used for calculating  $R(F)$ ,  $R_w(F^2)$  and the goodness of fit,  $S$ , are given below.<sup>S6</sup> The data were checked for secondary extinction effects but no correction was necessary. Neutral atom scattering factors and values used to calculate the linear absorption coefficient are from the International Tables for X-ray Crystallography (1992).<sup>S7</sup> All figures were generated using SHELXTL/PC.<sup>S8</sup> Tables of positional and thermal parameters, bond lengths and angles, torsion angles and figures are given below.



- <sup>S1</sup> DENZO-SMN. (1997). Z. Otwinowski and W. Minor, *Methods in Enzymology*, **276**: Macromolecular Crystallography, part A, 307 – 326, C. W. Carter, Jr. and R. M. Sweets, Editors, Academic Press.
- <sup>S2</sup> SIR97. (1999). A program for crystal structure solution. Altomare A., Burla M.C., Camalli M., Cascarano G.L., Giacovazzo C. , Guagliardi A., Moliterni A.G.G., Polidori G., Spagna R. *J. Appl. Cryst.* 32, 115-119.
- <sup>S3</sup> Sheldrick, G. M. (1994). SHELXL97. Program for the Refinement of Crystal Structures. University of Gottingen, Germany.
- <sup>S4</sup> Flack, H. D. (1983). *Acta Cryst.* A39, 876-881.
- <sup>S5</sup> Hooft, R. W. W., Straver, L. H. and Spek, A. L. (2008). *J. Appl. Cryst.* 41, 96-103.
- <sup>S6</sup>  $R_w(F^2) = \{ \sum w(|F_o|^2 - |F_c|^2)^2 / \sum w(|F_o|^4) \}^{1/2}$  where w is the weight given each reflection.
- $R(F) = \Sigma(|F_o| - |F_c|) / \Sigma|F_o|$  for reflections with  $F_o > 4(\sigma(F_o))$ .
- $S = [\sum w(|F_o|^2 - |F_c|^2)^2 / (n - p)]^{1/2}$ , where n is the number of reflections and p is the number of refined parameters.
- <sup>S7</sup> International Tables for X-ray Crystallography (1992). Vol. C, Tables 4.2.6.8 and 6.1.1.4, A. J. C. Wilson, editor, Boston: Kluwer Academic Press.
- <sup>S8</sup> Sheldrick, G. M. (1994). SHELXTL/PC (Version 5.03). Siemens Analytical X-ray Instruments, Inc., Madison, Wisconsin, USA.

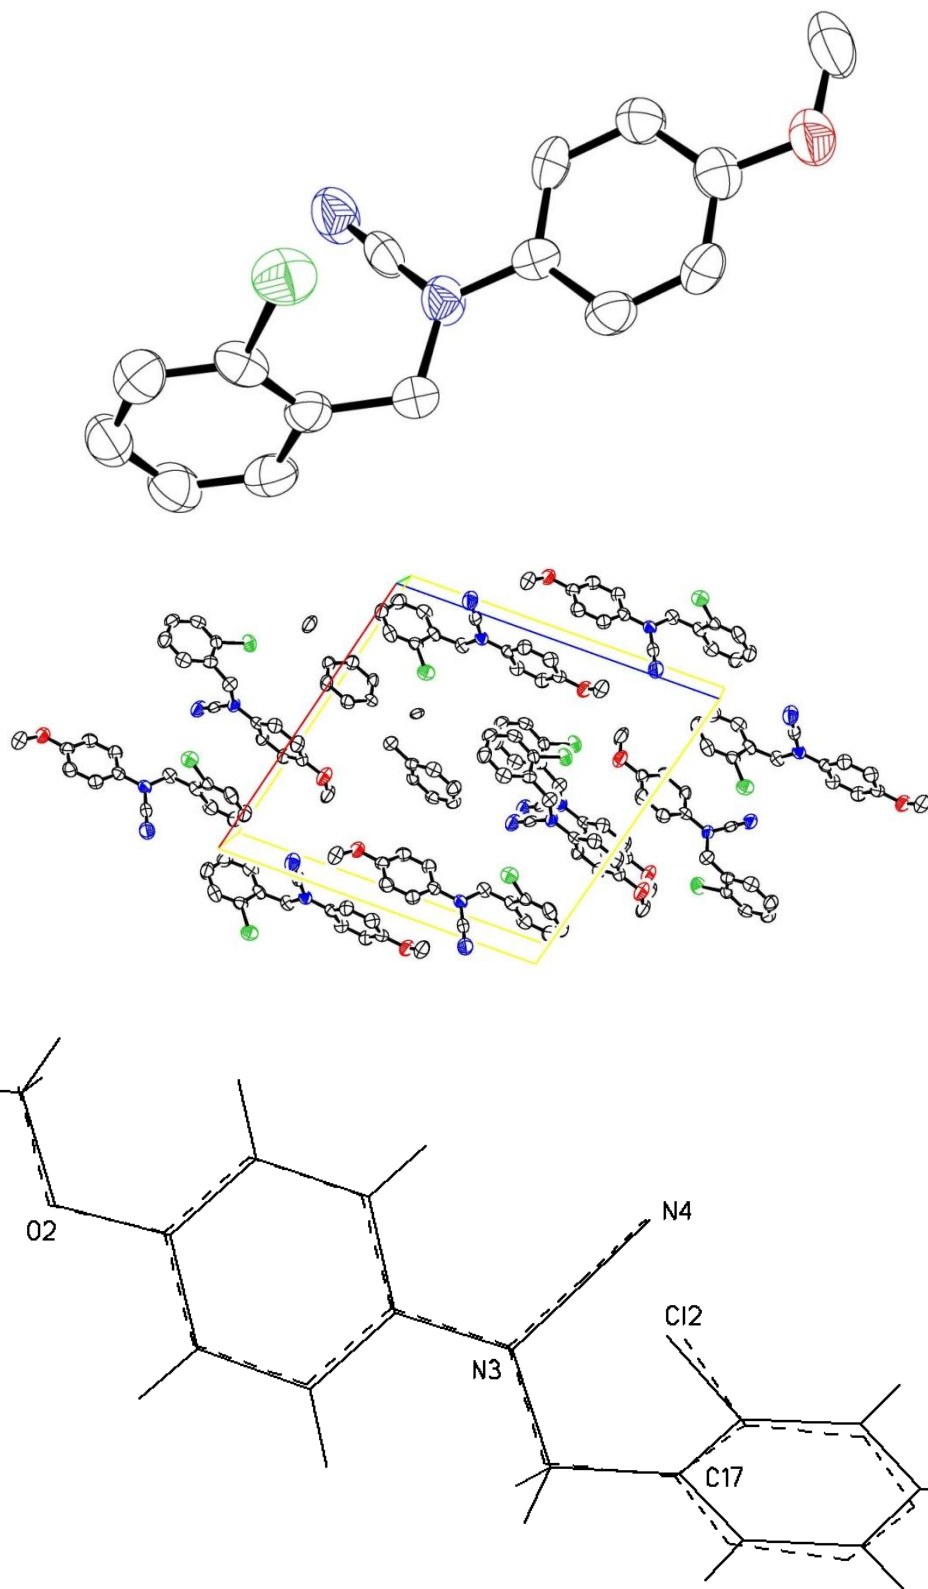

Figure S1. X-ray structures of **5**.

Table S1. Crystal data and structure refinement for **5**.

|                                   |                                                     |                  |
|-----------------------------------|-----------------------------------------------------|------------------|
| Empirical formula                 | C <sub>15</sub> H <sub>13</sub> Cl N <sub>2</sub> O |                  |
| Formula weight                    | 272.72                                              |                  |
| Temperature                       | 298(2) K                                            |                  |
| Wavelength                        | 1.54180 Å                                           |                  |
| Crystal system                    | Monoclinic                                          |                  |
| Space group                       | P21                                                 |                  |
| Unit cell dimensions              | a = 15.5380(13) Å                                   | α = 90°.         |
|                                   | b = 5.5510(6) Å                                     | β = 104.854(5)°. |
|                                   | c = 16.2790(15) Å                                   | γ = 90°.         |
| Volume                            | 1357.2(2) Å <sup>3</sup>                            |                  |
| Z                                 | 4                                                   |                  |
| Density (calculated)              | 1.335 Mg/m <sup>3</sup>                             |                  |
| Absorption coefficient            | 2.431 mm <sup>-1</sup>                              |                  |
| F(000)                            | 568                                                 |                  |
| Crystal size                      | 0.24 x 0.17 x 0.14 mm                               |                  |
| Theta range for data collection   | 6.99 to 66.58°.                                     |                  |
| Index ranges                      | -17<=h<=18, -6<=k<=6, -19<=l<=19                    |                  |
| Reflections collected             | 15994                                               |                  |
| Independent reflections           | 4704 [R(int) = 0.0470]                              |                  |
| Completeness to theta = 66.58°    | 99.6 %                                              |                  |
| Absorption correction             | Semi-empirical from equivalents                     |                  |
| Max. and min. transmission        | 1.00 and 0.794                                      |                  |
| Refinement method                 | Full-matrix least-squares on F <sup>2</sup>         |                  |
| Data / restraints / parameters    | 4704 / 1 / 346                                      |                  |
| Goodness-of-fit on F <sup>2</sup> | 1.249                                               |                  |
| Final R indices [I>2sigma(I)]     | R1 = 0.0926, wR2 = 0.1590                           |                  |
| R indices (all data)              | R1 = 0.1079, wR2 = 0.1664                           |                  |
| Absolute structure parameter      | 0.04(3)                                             |                  |
| Largest diff. peak and hole       | 0.283 and -0.379 e.Å <sup>-3</sup>                  |                  |

Table S2. Atomic coordinates ( $\times 10^4$ ) and equivalent isotropic displacement parameters ( $\text{\AA}^2 \times 10^3$ ) for **5**.  $U(\text{eq})$  is defined as one third of the trace of the orthogonalized  $U^{ij}$  tensor.

|     | x        | y         | z        | $U(\text{eq})$ |
|-----|----------|-----------|----------|----------------|
| C11 | 7479(1)  | 8375(3)   | 7812(1)  | 62(1)          |
| O1  | 8573(3)  | 11217(9)  | 3530(3)  | 61(1)          |
| N1  | 9009(3)  | 11118(9)  | 7038(3)  | 46(1)          |
| N2  | 10135(4) | 8463(13)  | 7930(3)  | 81(2)          |
| C1  | 8561(4)  | 12191(10) | 8347(4)  | 43(1)          |
| C2  | 8148(3)  | 10261(11) | 8591(4)  | 46(2)          |
| C3  | 8210(4)  | 9705(12)  | 9430(4)  | 58(2)          |
| C4  | 8715(4)  | 11179(15) | 10051(4) | 65(2)          |
| C5  | 9134(4)  | 13119(15) | 9837(4)  | 65(2)          |
| C6  | 9071(4)  | 13606(12) | 8994(4)  | 56(2)          |
| C7  | 8500(4)  | 12811(11) | 7432(3)  | 48(2)          |
| C8  | 9617(4)  | 9718(13)  | 7521(4)  | 54(2)          |
| C10 | 8890(3)  | 11093(11) | 6136(3)  | 40(1)          |
| C11 | 9272(4)  | 9321(12)  | 5762(3)  | 51(2)          |
| C12 | 9180(4)  | 9286(13)  | 4895(4)  | 53(2)          |
| C13 | 8694(4)  | 11044(13) | 4397(4)  | 50(2)          |
| C14 | 8311(4)  | 12805(11) | 4762(4)  | 52(2)          |
| C15 | 8409(4)  | 12862(11) | 5633(3)  | 48(2)          |
| C16 | 8851(4)  | 9266(16)  | 3112(4)  | 79(2)          |
| Cl2 | 6382(1)  | 9201(3)   | 2848(1)  | 62(1)          |
| O2  | 3226(3)  | 7448(9)   | -1412(2) | 66(1)          |
| N3  | 4473(3)  | 6601(9)   | 2099(3)  | 45(1)          |
| N4  | 3804(3)  | 9143(12)  | 3017(3)  | 66(2)          |
| C17 | 5590(3)  | 5397(10)  | 3394(3)  | 42(1)          |
| C18 | 6144(4)  | 7313(11)  | 3635(3)  | 43(1)          |
| C19 | 6537(3)  | 7880(12)  | 4474(4)  | 50(2)          |
| C20 | 6359(4)  | 6431(12)  | 5097(4)  | 54(2)          |
| C21 | 5815(4)  | 4489(14)  | 4882(4)  | 57(2)          |
| C22 | 5435(4)  | 3943(12)  | 4046(4)  | 52(2)          |
| C23 | 5156(4)  | 4813(10)  | 2489(3)  | 46(2)          |
| C24 | 4113(4)  | 7959(12)  | 2597(3)  | 43(1)          |

|     |         |          |          |       |
|-----|---------|----------|----------|-------|
| C26 | 4156(3) | 6840(10) | 1197(3)  | 37(1) |
| C27 | 4372(4) | 5158(10) | 659(4)   | 47(2) |
| C28 | 4045(4) | 5465(11) | -214(4)  | 52(2) |
| C29 | 3515(4) | 7357(12) | -542(4)  | 46(2) |
| C30 | 3309(4) | 9061(12) | -3(3)    | 51(2) |
| C31 | 3633(3) | 8797(11) | 864(3)   | 47(2) |
| C32 | 2604(4) | 9238(16) | -1775(4) | 73(2) |

---

Table S3. Bond lengths [Å] and angles [°] for **5**.

---

|          |          |            |          |
|----------|----------|------------|----------|
| C11-C2   | 1.764(6) | O2-C29     | 1.373(6) |
| O1-C13   | 1.378(6) | O2-C32     | 1.407(8) |
| O1-C16   | 1.405(8) | N3-C24     | 1.330(7) |
| N1-C8    | 1.316(7) | N3-C26     | 1.430(6) |
| N1-C10   | 1.433(6) | N3-C23     | 1.472(6) |
| N1-C7    | 1.476(7) | N4-C24     | 1.140(7) |
| N2-C8    | 1.141(7) | C17-C18    | 1.361(7) |
| C1-C2    | 1.359(7) | C17-C22    | 1.403(7) |
| C1-C6    | 1.389(7) | C17-C23    | 1.491(7) |
| C1-C7    | 1.508(7) | C18-C19    | 1.382(7) |
| C2-C3    | 1.379(7) | C19-C20    | 1.376(8) |
| C3-C4    | 1.379(9) | C19-H19    | 0.93     |
| C3-H3    | 0.93     | C20-C21    | 1.359(9) |
| C4-C5    | 1.350(9) | C20-H20    | 0.93     |
| C4-H4    | 0.93     | C21-C22    | 1.371(7) |
| C5-C6    | 1.376(8) | C21-H21    | 0.93     |
| C5-H5    | 0.93     | C22-H22    | 0.93     |
| C6-H6    | 0.93     | C23-H23A   | 0.97     |
| C7-H7A   | 0.97     | C23-H23B   | 0.97     |
| C7-H7B   | 0.97     | C26-C27    | 1.380(7) |
| C10-C11  | 1.369(8) | C26-C31    | 1.381(7) |
| C10-C15  | 1.370(7) | C27-C28    | 1.391(7) |
| C11-C12  | 1.382(7) | C27-H27    | 0.93     |
| C11-H11  | 0.93     | C28-C29    | 1.357(8) |
| C12-C13  | 1.366(8) | C28-H28    | 0.93     |
| C12-H12  | 0.93     | C29-C30    | 1.383(8) |
| C13-C14  | 1.359(8) | C30-C31    | 1.379(7) |
| C14-C15  | 1.387(7) | C30-H30    | 0.93     |
| C14-H14  | 0.93     | C31-H31    | 0.93     |
| C15-H15  | 0.93     | C32-H32A   | 0.96     |
| C16-H16A | 0.96     | C32-H32B   | 0.96     |
| C16-H16B | 0.96     | C32-H32C   | 0.96     |
| C16-H16C | 0.96     | C13-O1-C16 | 117.7(5) |
| C12-C18  | 1.766(6) | C8-N1-C10  | 119.4(5) |

|             |          |               |          |
|-------------|----------|---------------|----------|
| C8-N1-C7    | 120.0(5) | C14-C13-C12   | 119.4(6) |
| C10-N1-C7   | 120.5(5) | C14-C13-O1    | 116.0(6) |
| C2-C1-C6    | 116.4(5) | C12-C13-O1    | 124.6(6) |
| C2-C1-C7    | 123.7(5) | C13-C14-C15   | 121.2(6) |
| C6-C1-C7    | 120.0(5) | C13-C14-H14   | 119.4    |
| C1-C2-C3    | 123.2(6) | C15-C14-H14   | 119.4    |
| C1-C2-C11   | 119.5(5) | C10-C15-C14   | 119.6(6) |
| C3-C2-C11   | 117.3(5) | C10-C15-H15   | 120.2    |
| C4-C3-C2    | 118.4(6) | C14-C15-H15   | 120.2    |
| C4-C3-H3    | 120.8    | O1-C16-H16A   | 109.5    |
| C2-C3-H3    | 120.8    | O1-C16-H16B   | 109.5    |
| C5-C4-C3    | 120.3(6) | H16A-C16-H16B | 109.5    |
| C5-C4-H4    | 119.9    | O1-C16-H16C   | 109.5    |
| C3-C4-H4    | 119.9    | H16A-C16-H16C | 109.5    |
| C4-C5-C6    | 119.9(7) | H16B-C16-H16C | 109.5    |
| C4-C5-H5    | 120.0    | C29-O2-C32    | 117.8(5) |
| C6-C5-H5    | 120.0    | C24-N3-C26    | 119.0(4) |
| C5-C6-C1    | 121.7(6) | C24-N3-C23    | 119.3(4) |
| C5-C6-H6    | 119.1    | C26-N3-C23    | 121.7(4) |
| C1-C6-H6    | 119.1    | C18-C17-C22   | 116.7(5) |
| N1-C7-C1    | 112.2(5) | C18-C17-C23   | 123.2(5) |
| N1-C7-H7A   | 109.2    | C22-C17-C23   | 120.1(5) |
| C1-C7-H7A   | 109.2    | C17-C18-C19   | 123.3(5) |
| N1-C7-H7B   | 109.2    | C17-C18-C12   | 119.3(4) |
| C1-C7-H7B   | 109.2    | C19-C18-C12   | 117.4(5) |
| H7A-C7-H7B  | 107.9    | C20-C19-C18   | 118.3(6) |
| N2-C8-N1    | 178.5(8) | C20-C19-H19   | 120.8    |
| C11-C10-C15 | 118.8(5) | C18-C19-H19   | 120.8    |
| C11-C10-N1  | 120.3(5) | C21-C20-C19   | 120.2(6) |
| C15-C10-N1  | 120.8(5) | C21-C20-H20   | 119.9    |
| C10-C11-C12 | 121.4(6) | C19-C20-H20   | 119.9    |
| C10-C11-H11 | 119.3    | C20-C21-C22   | 120.8(6) |
| C12-C11-H11 | 119.3    | C20-C21-H21   | 119.6    |
| C13-C12-C11 | 119.6(6) | C22-C21-H21   | 119.6    |
| C13-C12-H12 | 120.2    | C21-C22-C17   | 120.7(6) |
| C11-C12-H12 | 120.2    | C21-C22-H22   | 119.7    |

|               |          |               |          |
|---------------|----------|---------------|----------|
| C17-C22-H22   | 119.7    | C27-C28-H28   | 119.2    |
| N3-C23-C17    | 111.9(4) | C28-C29-O2    | 116.1(5) |
| N3-C23-H23A   | 109.2    | C28-C29-C30   | 119.7(5) |
| C17-C23-H23A  | 109.2    | O2-C29-C30    | 124.2(6) |
| N3-C23-H23B   | 109.2    | C31-C30-C29   | 119.6(6) |
| C17-C23-H23B  | 109.2    | C31-C30-H30   | 120.2    |
| H23A-C23-H23B | 107.9    | C29-C30-H30   | 120.2    |
| N4-C24-N3     | 179.2(6) | C30-C31-C26   | 120.6(5) |
| C27-C26-C31   | 119.8(5) | C30-C31-H31   | 119.7    |
| C27-C26-N3    | 120.9(5) | C26-C31-H31   | 119.7    |
| C31-C26-N3    | 119.3(5) | O2-C32-H32A   | 109.5    |
| C26-C27-C28   | 118.7(5) | O2-C32-H32B   | 109.5    |
| C26-C27-H27   | 120.6    | H32A-C32-H32B | 109.5    |
| C28-C27-H27   | 120.6    | O2-C32-H32C   | 109.5    |
| C29-C28-C27   | 121.5(5) | H32A-C32-H32C | 109.5    |
| C29-C28-H28   | 119.2    | H32B-C32-H32C | 109.5    |

---



Table S4. Anisotropic displacement parameters ( $\text{\AA}^2 \times 10^3$ ) for **5**. The anisotropic displacement factor exponent takes the form:  $-2\pi^2 [ h^2 a^{*2} U^{11} + \dots + 2 h k a^* b^* U^{12} ]$

|     | U <sup>11</sup> | U <sup>22</sup> | U <sup>33</sup> | U <sup>23</sup> | U <sup>13</sup> | U <sup>12</sup> |
|-----|-----------------|-----------------|-----------------|-----------------|-----------------|-----------------|
| Cl1 | 60(1)           | 52(1)           | 71(1)           | -9(1)           | 13(1)           | -9(1)           |
| O1  | 67(3)           | 69(3)           | 45(2)           | 0(2)            | 11(2)           | 9(3)            |
| N1  | 42(3)           | 51(3)           | 49(3)           | 3(3)            | 16(2)           | 7(2)            |
| N2  | 82(4)           | 106(6)          | 60(4)           | 21(4)           | 26(3)           | 41(4)           |
| C1  | 43(3)           | 34(3)           | 57(4)           | 2(3)            | 21(3)           | -2(3)           |
| C2  | 37(3)           | 46(4)           | 56(4)           | -14(3)          | 15(3)           | 0(3)            |
| C3  | 61(4)           | 51(4)           | 74(4)           | 7(4)            | 37(4)           | 0(4)            |
| C4  | 73(5)           | 80(6)           | 45(4)           | 2(4)            | 21(4)           | 9(4)            |
| C5  | 63(4)           | 77(6)           | 51(4)           | -16(4)          | 10(3)           | 9(4)            |
| C6  | 53(4)           | 46(4)           | 70(4)           | -11(4)          | 20(3)           | -3(3)           |
| C7  | 51(3)           | 38(4)           | 58(4)           | 6(3)            | 20(3)           | 2(3)            |
| C8  | 50(4)           | 75(5)           | 43(4)           | 0(3)            | 21(3)           | 11(4)           |
| C10 | 38(3)           | 38(3)           | 47(3)           | 5(3)            | 14(3)           | -1(3)           |
| C11 | 55(4)           | 46(4)           | 50(3)           | 11(3)           | 13(3)           | 13(3)           |
| C12 | 53(4)           | 49(4)           | 59(4)           | -8(4)           | 16(3)           | 9(4)            |
| C13 | 38(3)           | 62(4)           | 47(4)           | 4(3)            | 7(3)            | -4(3)           |
| C14 | 53(4)           | 46(4)           | 54(4)           | 12(3)           | 9(3)            | 15(3)           |
| C15 | 54(3)           | 39(4)           | 52(4)           | -3(3)           | 16(3)           | 3(3)            |
| C16 | 87(5)           | 100(6)          | 48(4)           | -6(5)           | 15(3)           | 1(5)            |
| Cl2 | 67(1)           | 56(1)           | 68(1)           | 10(1)           | 29(1)           | -8(1)           |
| O2  | 86(3)           | 71(3)           | 38(2)           | -3(2)           | 11(2)           | 22(3)           |
| N3  | 49(3)           | 53(3)           | 35(3)           | -2(2)           | 14(2)           | 6(3)            |
| N4  | 68(3)           | 83(4)           | 44(3)           | -4(3)           | 11(3)           | 24(4)           |
| C17 | 37(3)           | 36(3)           | 49(3)           | -1(3)           | 7(3)            | 6(3)            |
| C18 | 41(3)           | 51(4)           | 43(3)           | 13(3)           | 18(3)           | 10(3)           |
| C19 | 35(3)           | 53(4)           | 63(4)           | -7(3)           | 11(3)           | -4(3)           |
| C20 | 51(4)           | 63(5)           | 43(3)           | 1(3)            | 4(3)            | 7(4)            |
| C21 | 66(4)           | 60(4)           | 47(4)           | 12(4)           | 15(3)           | 7(4)            |
| C22 | 55(4)           | 35(4)           | 64(4)           | 3(3)            | 15(3)           | 0(3)            |
| C23 | 54(4)           | 36(4)           | 45(3)           | 0(3)            | 8(3)            | 5(3)            |
| C24 | 36(3)           | 53(4)           | 33(3)           | 7(3)            | -4(2)           | 0(3)            |

|     |       |       |       |        |       |       |
|-----|-------|-------|-------|--------|-------|-------|
| C26 | 31(3) | 34(3) | 49(3) | 0(3)   | 13(2) | 0(2)  |
| C27 | 50(4) | 40(4) | 53(4) | -1(3)  | 16(3) | 10(3) |
| C28 | 68(4) | 45(4) | 45(4) | -13(3) | 20(3) | 6(3)  |
| C29 | 46(3) | 54(4) | 42(3) | 3(3)   | 16(3) | -6(3) |
| C30 | 56(4) | 48(4) | 47(3) | 3(3)   | 13(3) | 10(3) |
| C31 | 54(3) | 51(4) | 37(3) | -17(3) | 17(3) | -4(3) |
| C32 | 87(5) | 93(6) | 35(3) | 6(4)   | 10(3) | -8(5) |

---

Table S5. Hydrogen coordinates ( $\times 10^4$ ) and isotropic displacement parameters ( $\text{\AA}^2 \times 10^{-3}$ ) for **5**.

|      | x    | y     | z     | U(eq) |
|------|------|-------|-------|-------|
| H3   | 7919 | 8367  | 9573  | 70    |
| H4   | 8766 | 10836 | 10621 | 78    |
| H5   | 9465 | 14124 | 10257 | 78    |
| H6   | 9379 | 14917 | 8855  | 67    |
| H7A  | 7880 | 12787 | 7112  | 58    |
| H7B  | 8725 | 14430 | 7402  | 58    |
| H11  | 9600 | 8115  | 6099  | 61    |
| H12  | 9446 | 8073  | 4652  | 64    |
| H14  | 7977 | 13995 | 4422  | 62    |
| H15  | 8150 | 14094 | 5875  | 58    |
| H16A | 9486 | 9104  | 3302  | 118   |
| H16B | 8683 | 9545  | 2510  | 118   |
| H16C | 8573 | 7814  | 3237  | 118   |
| H19  | 6911 | 9206  | 4615  | 61    |
| H20  | 6611 | 6783  | 5666  | 65    |
| H21  | 5700 | 3518  | 5307  | 69    |
| H22  | 5071 | 2595  | 3911  | 62    |
| H23A | 5605 | 4757  | 2171  | 55    |
| H23B | 4883 | 3233  | 2457  | 55    |
| H27  | 4730 | 3843  | 875   | 56    |
| H28  | 4192 | 4346  | -581  | 62    |
| H30  | 2954 | 10377 | -223  | 61    |
| H31  | 3498 | 9947  | 1227  | 56    |
| H32A | 2097 | 9125  | -1542 | 109   |
| H32B | 2417 | 9013  | -2379 | 109   |
| H32C | 2873 | 10798 | -1651 | 109   |

Table S6. Torsion angles [°] for **5**.

|                 |           |                 |           |
|-----------------|-----------|-----------------|-----------|
| C6-C1-C2-C3     | 0.8(8)    | C22-C17-C18-C19 | -1.0(8)   |
| C7-C1-C2-C3     | 179.8(5)  | C23-C17-C18-C19 | 179.0(5)  |
| C6-C1-C2-C11    | 179.5(4)  | C22-C17-C18-C12 | 179.2(4)  |
| C7-C1-C2-C11    | -1.5(7)   | C23-C17-C18-C12 | -0.8(7)   |
| C1-C2-C3-C4     | 0.1(9)    | C17-C18-C19-C20 | 0.1(8)    |
| C11-C2-C3-C4    | -178.7(5) | C12-C18-C19-C20 | 179.9(4)  |
| C2-C3-C4-C5     | 0.1(9)    | C18-C19-C20-C21 | 0.5(9)    |
| C3-C4-C5-C6     | -1.1(10)  | C19-C20-C21-C22 | -0.1(9)   |
| C4-C5-C6-C1     | 2.1(9)    | C20-C21-C22-C17 | -0.8(9)   |
| C2-C1-C6-C5     | -1.9(8)   | C18-C17-C22-C21 | 1.4(8)    |
| C7-C1-C6-C5     | 179.1(5)  | C23-C17-C22-C21 | -178.6(5) |
| C8-N1-C7-C1     | -17.0(7)  | C24-N3-C23-C17  | -21.5(7)  |
| C10-N1-C7-C1    | 167.1(5)  | C26-N3-C23-C17  | 161.4(5)  |
| C2-C1-C7-N1     | -71.9(7)  | C18-C17-C23-N3  | -69.4(7)  |
| C6-C1-C7-N1     | 107.0(6)  | C22-C17-C23-N3  | 110.6(6)  |
| C8-N1-C10-C11   | 12.7(8)   | C24-N3-C26-C27  | -166.6(5) |
| C7-N1-C10-C11   | -171.4(5) | C23-N3-C26-C27  | 10.4(8)   |
| C8-N1-C10-C15   | -165.9(6) | C24-N3-C26-C31  | 14.0(7)   |
| C7-N1-C10-C15   | 10.0(8)   | C23-N3-C26-C31  | -169.0(5) |
| C15-C10-C11-C12 | -0.1(9)   | C31-C26-C27-C28 | -0.8(8)   |
| N1-C10-C11-C12  | -178.8(5) | N3-C26-C27-C28  | 179.8(5)  |
| C10-C11-C12-C13 | -0.4(9)   | C26-C27-C28-C29 | -0.6(9)   |
| C11-C12-C13-C14 | 0.2(9)    | C27-C28-C29-O2  | -179.3(5) |
| C11-C12-C13-O1  | 178.6(5)  | C27-C28-C29-C30 | 1.5(9)    |
| C16-O1-C13-C14  | -171.4(5) | C32-O2-C29-C28  | 173.6(5)  |
| C16-O1-C13-C12  | 10.2(9)   | C32-O2-C29-C30  | -7.3(8)   |
| C12-C13-C14-C15 | 0.5(9)    | C28-C29-C30-C31 | -1.0(8)   |
| O1-C13-C14-C15  | -178.1(5) | O2-C29-C30-C31  | 179.9(5)  |
| C11-C10-C15-C14 | 0.8(8)    | C29-C30-C31-C26 | -0.4(8)   |
| N1-C10-C15-C14  | 179.4(5)  | C27-C26-C31-C30 | 1.3(8)    |
| C13-C14-C15-C10 | -1.0(9)   | N3-C26-C31-C30  | -179.2(5) |

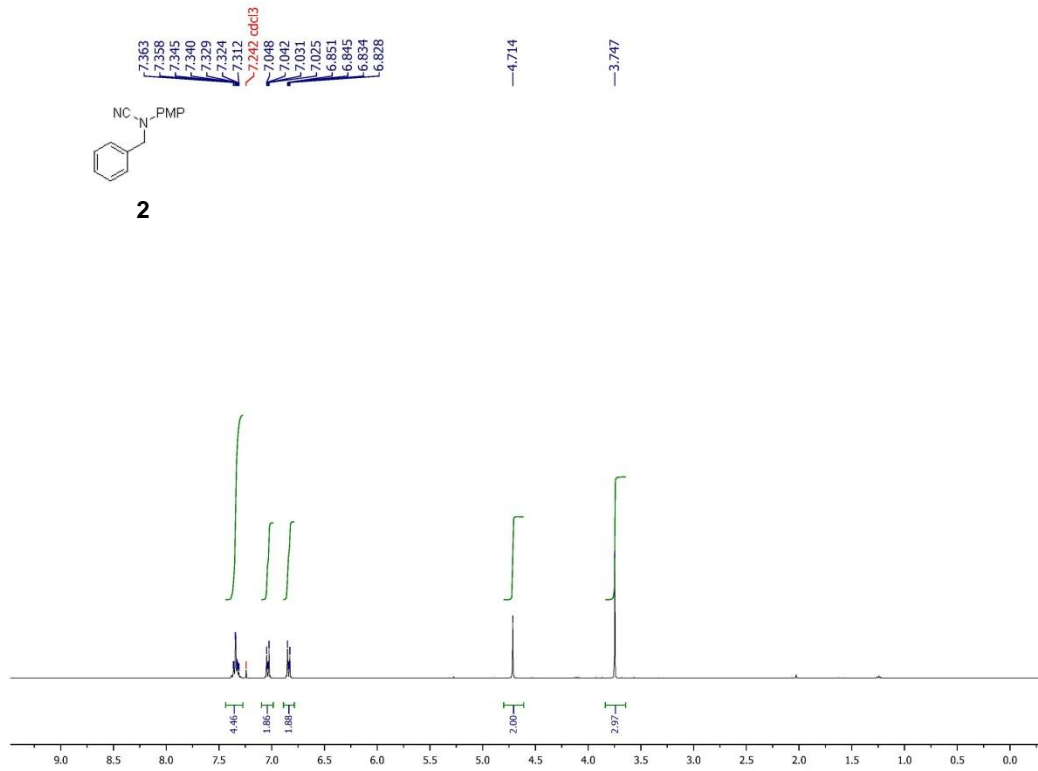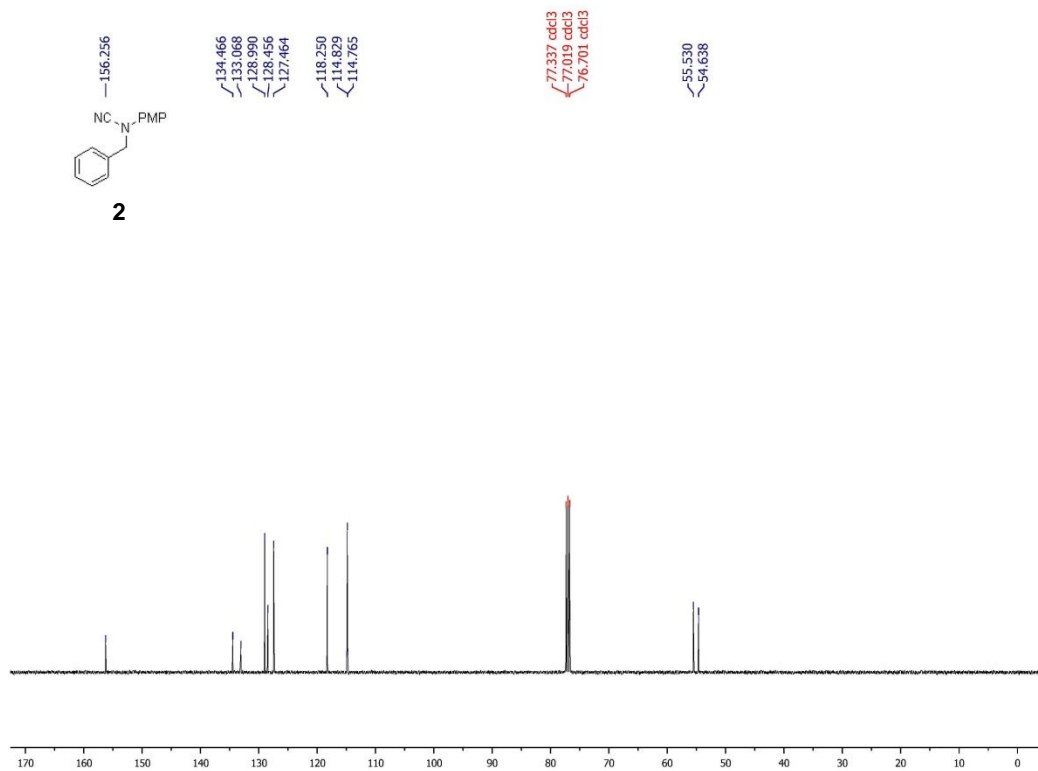

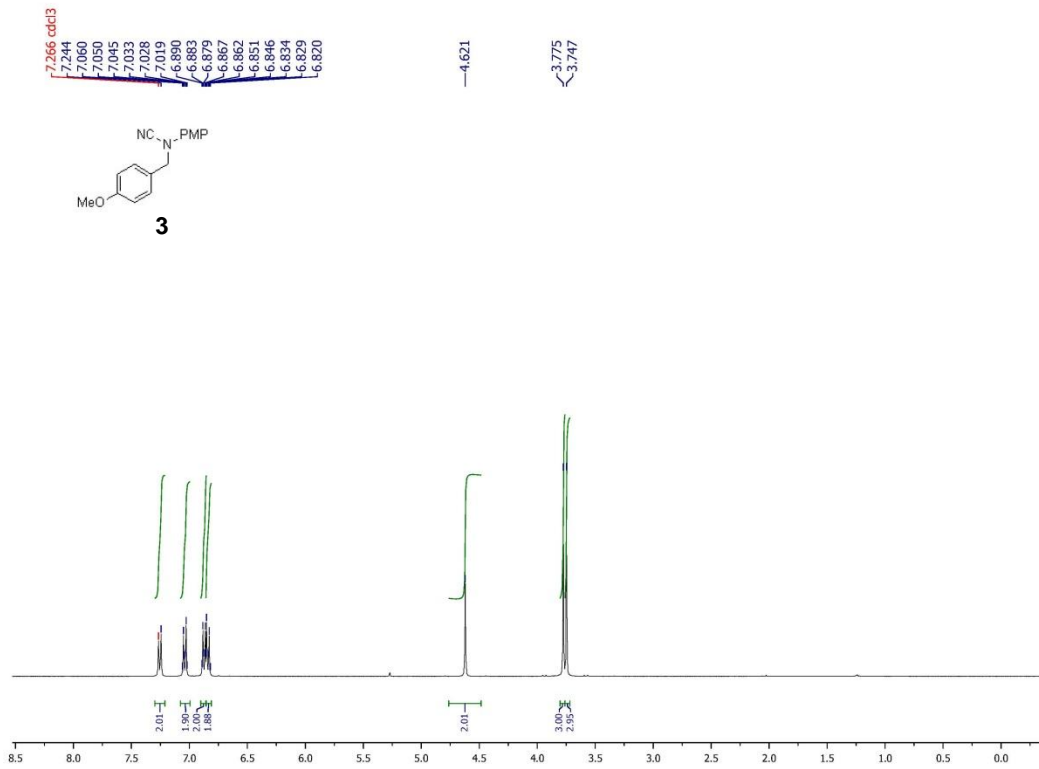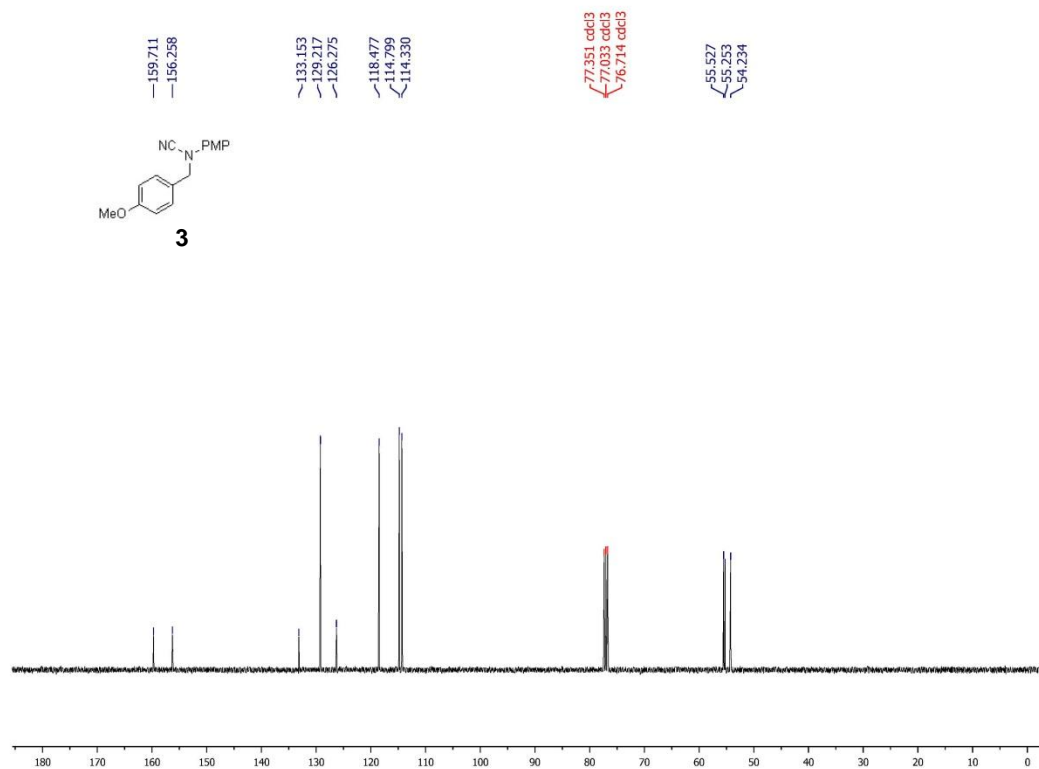

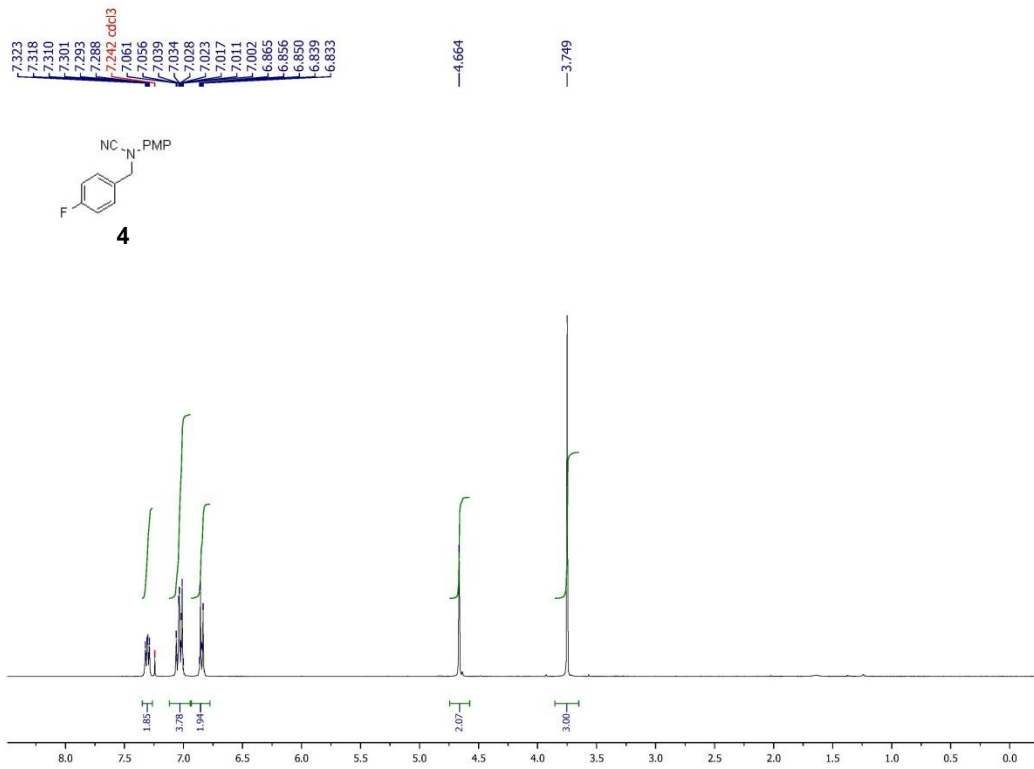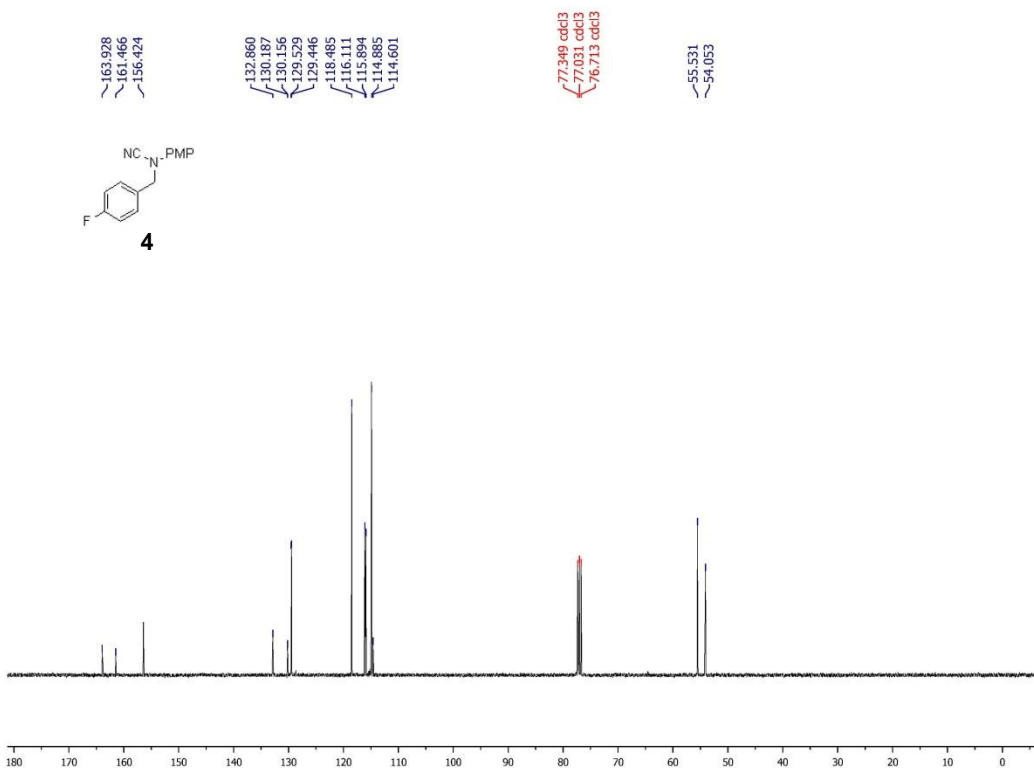

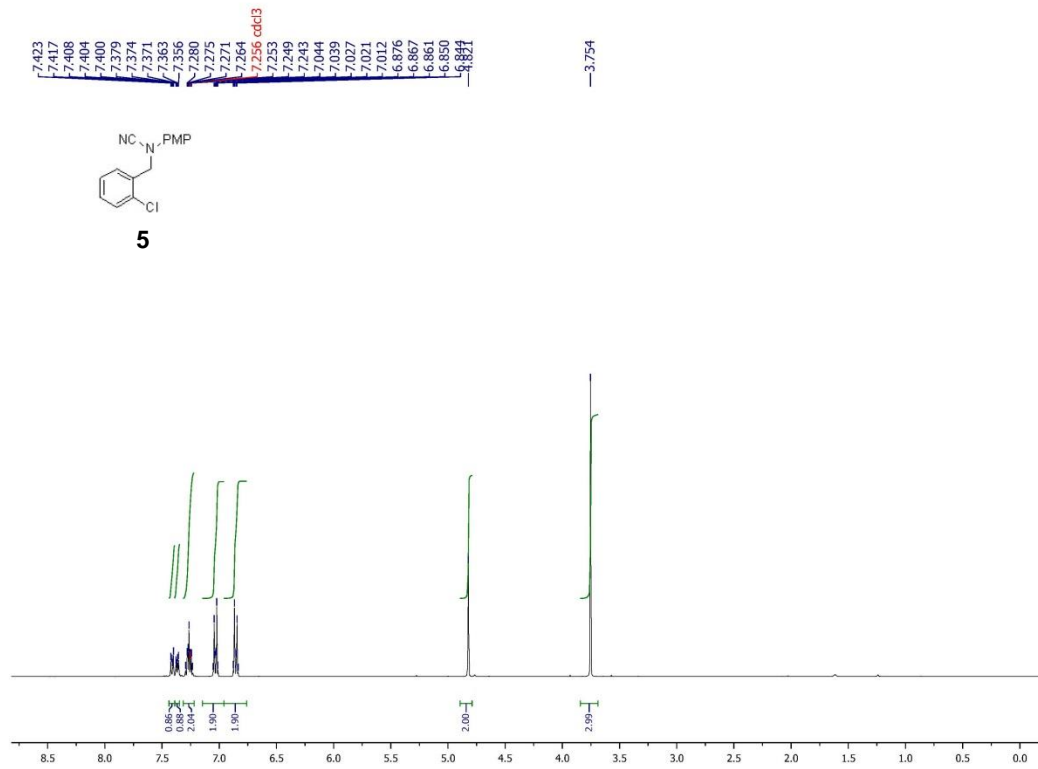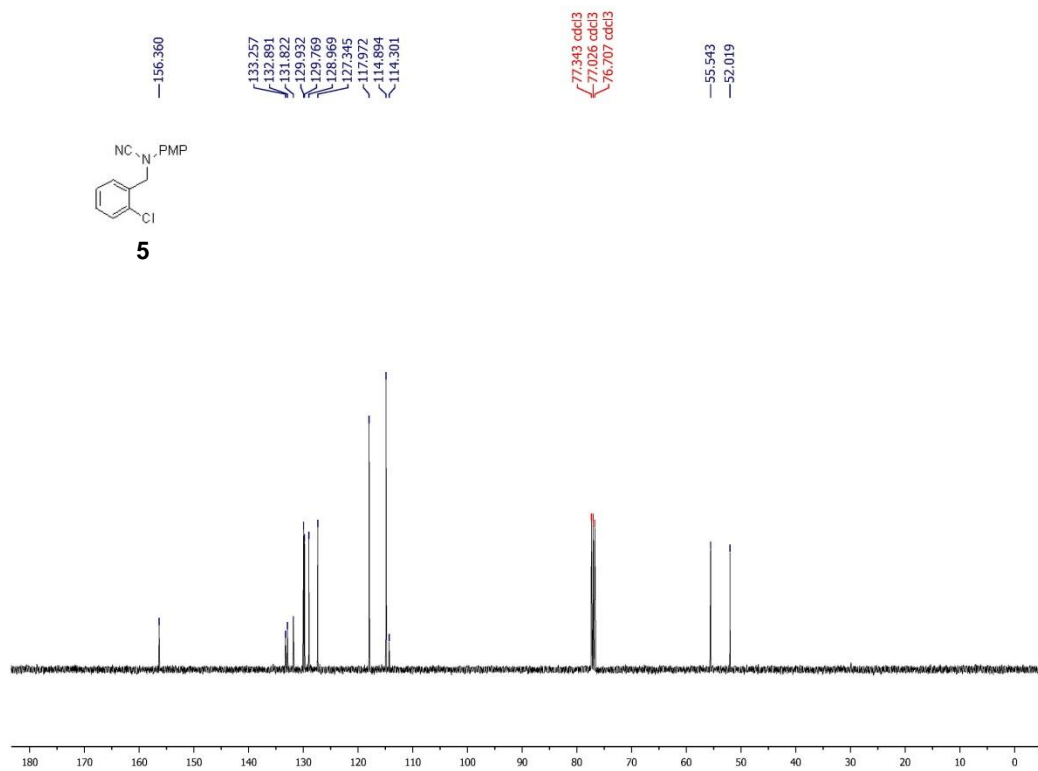



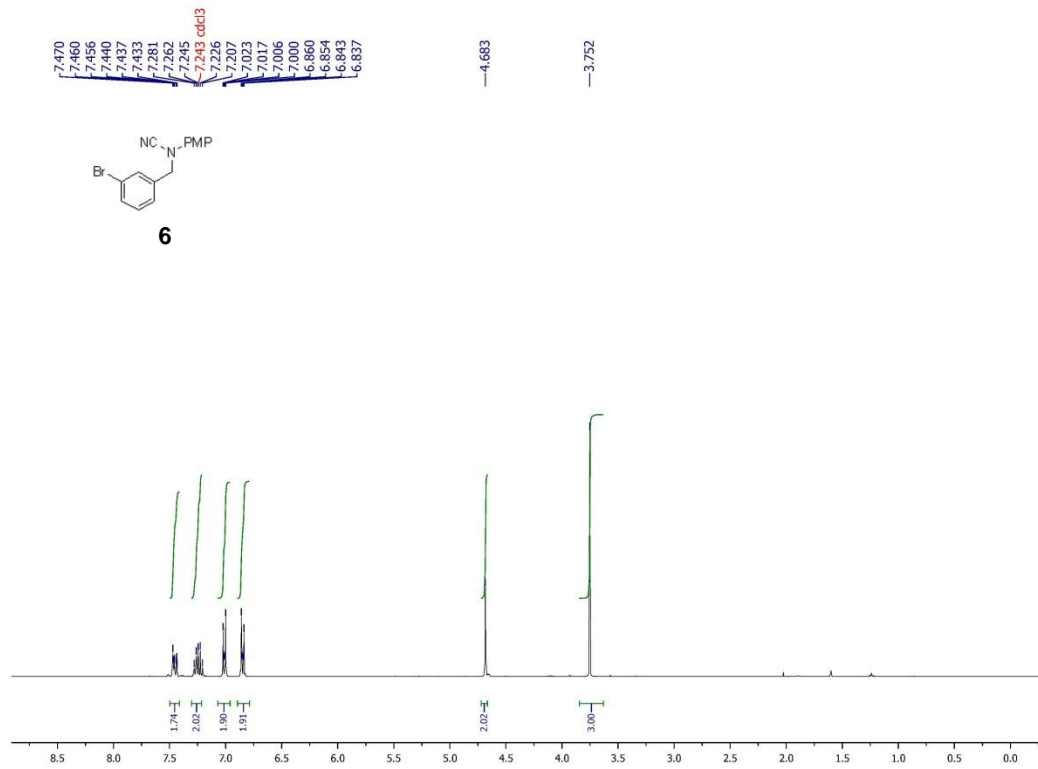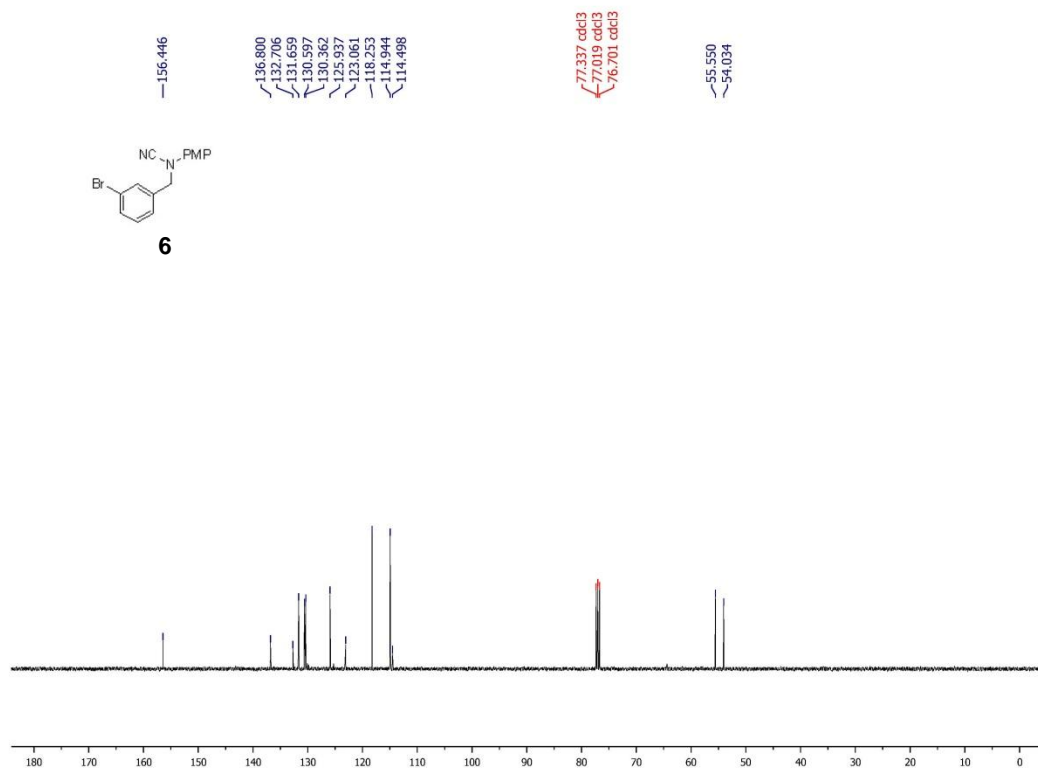

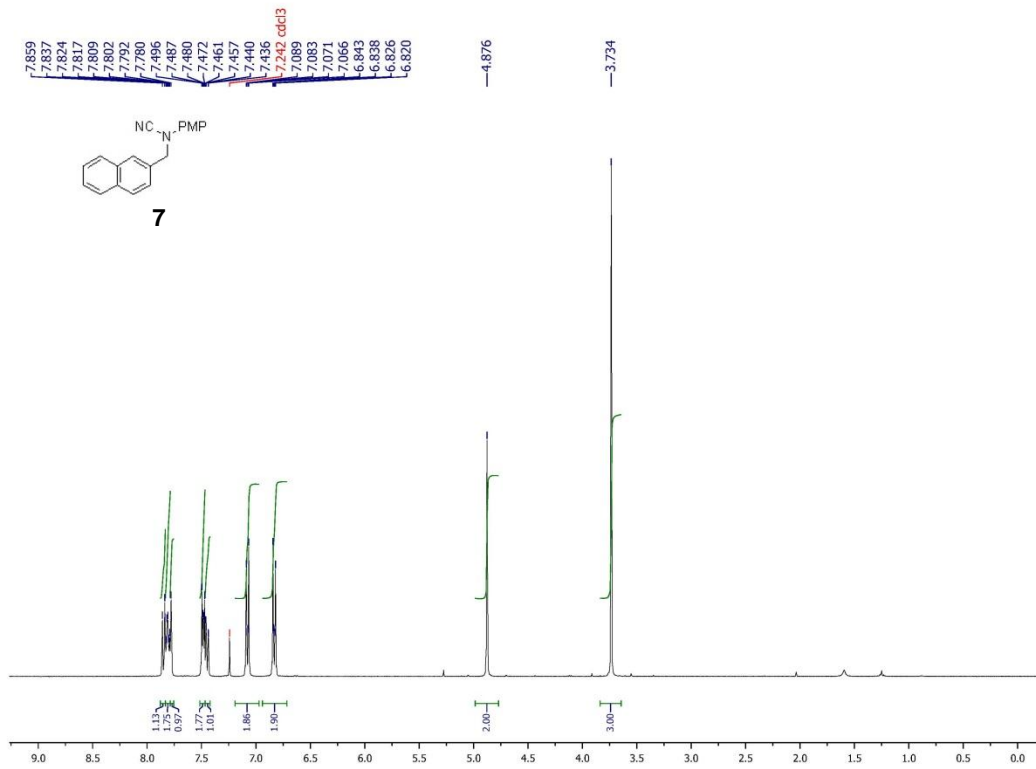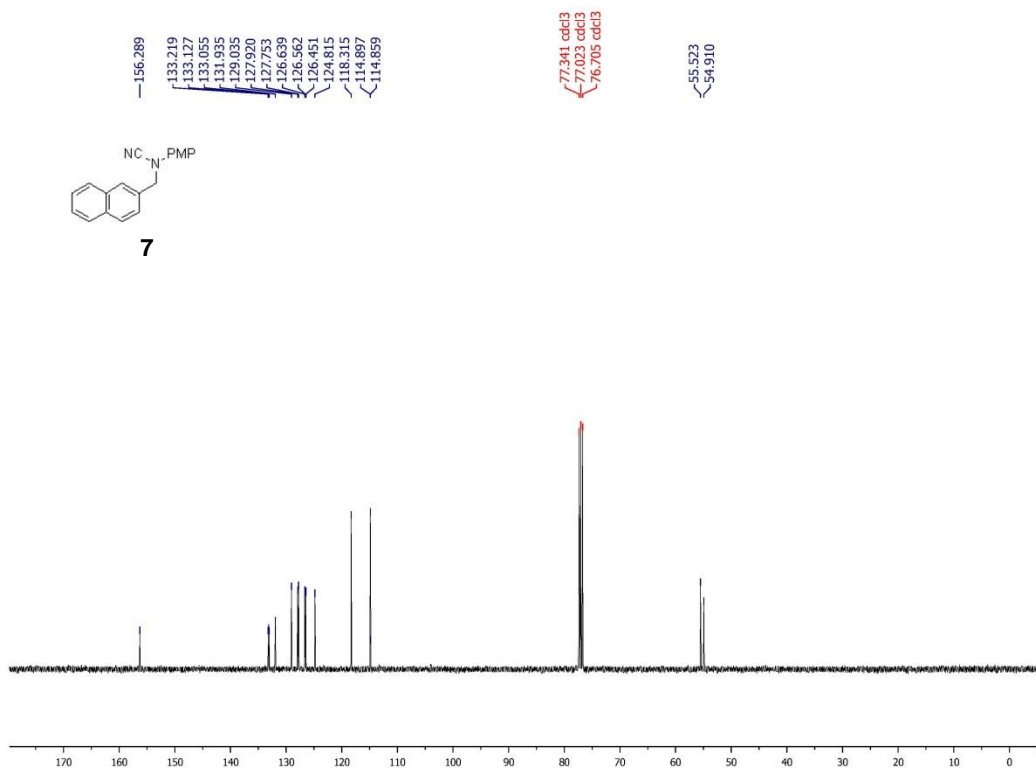

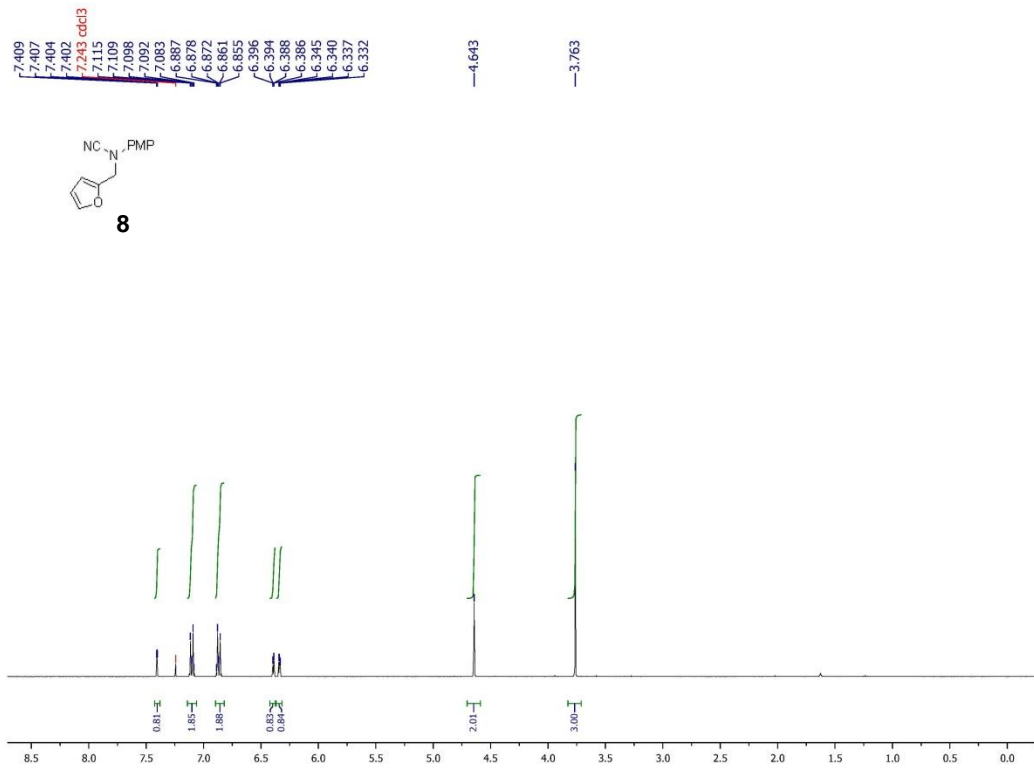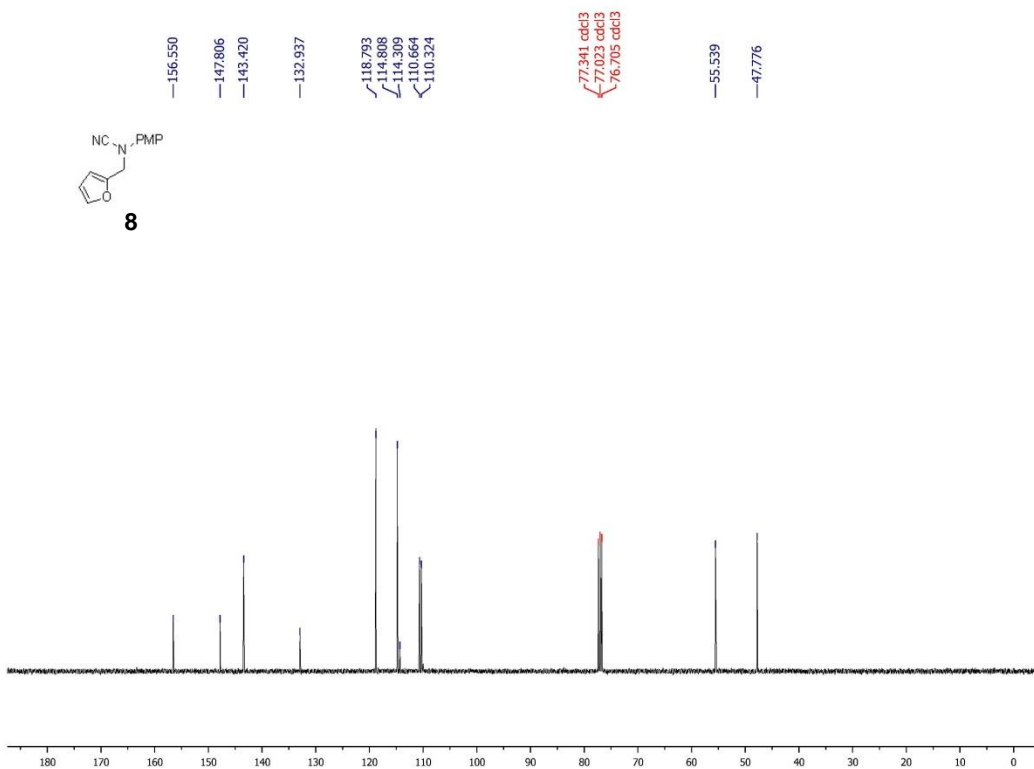

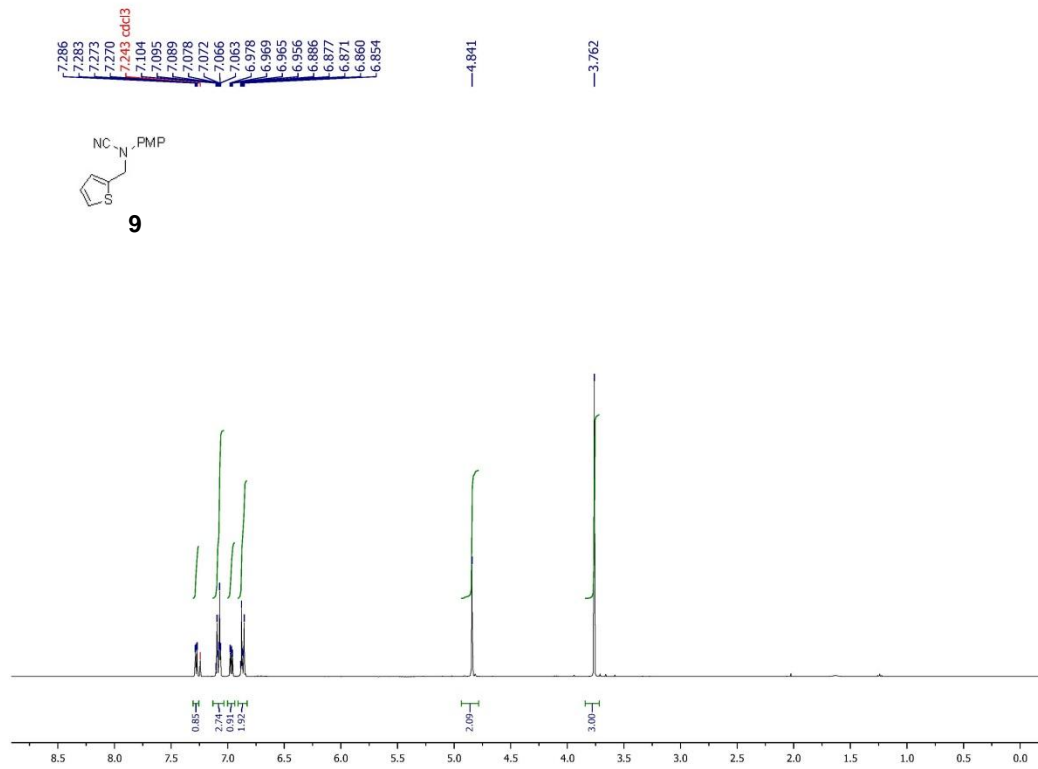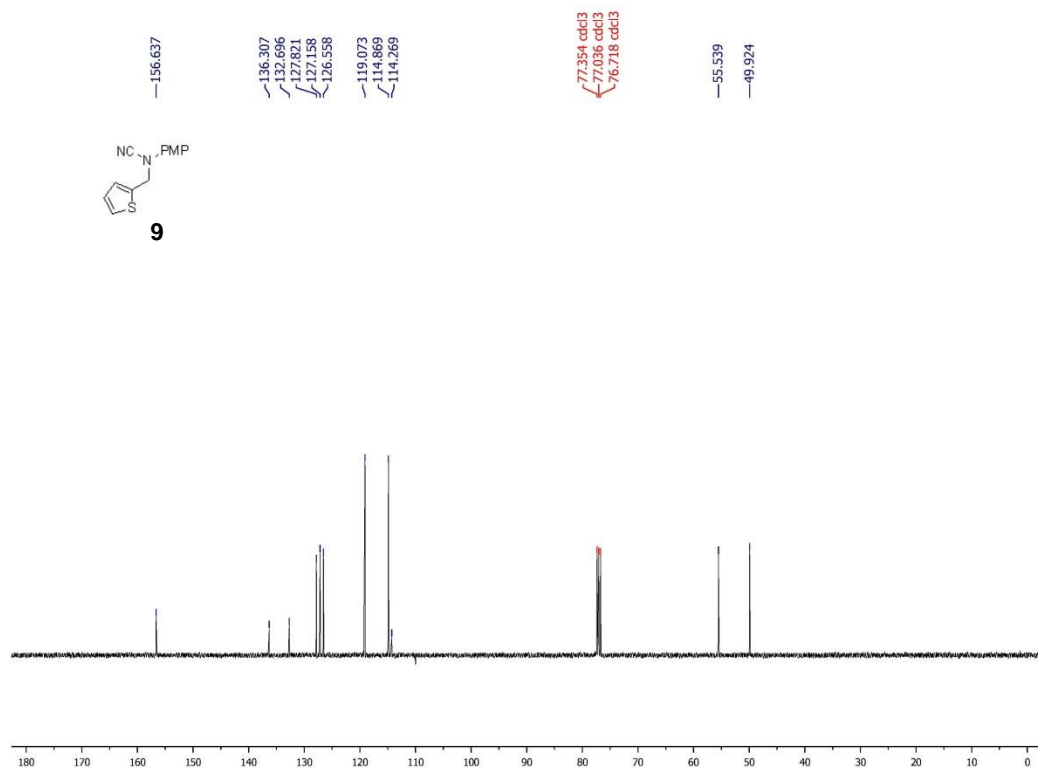

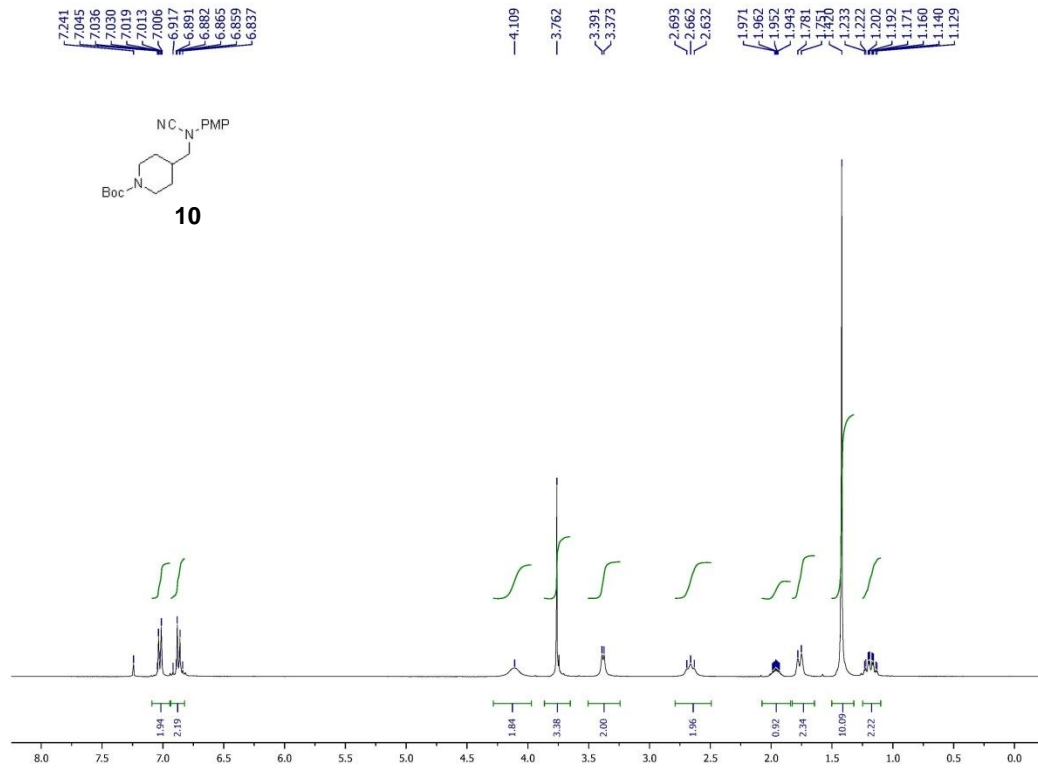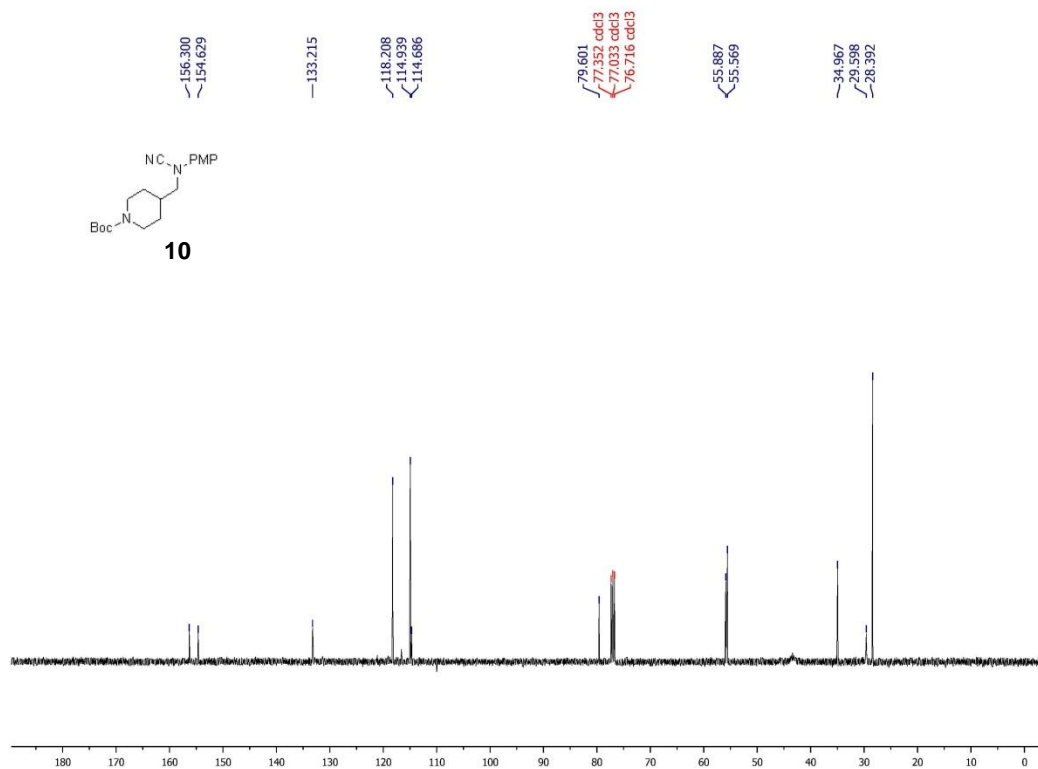

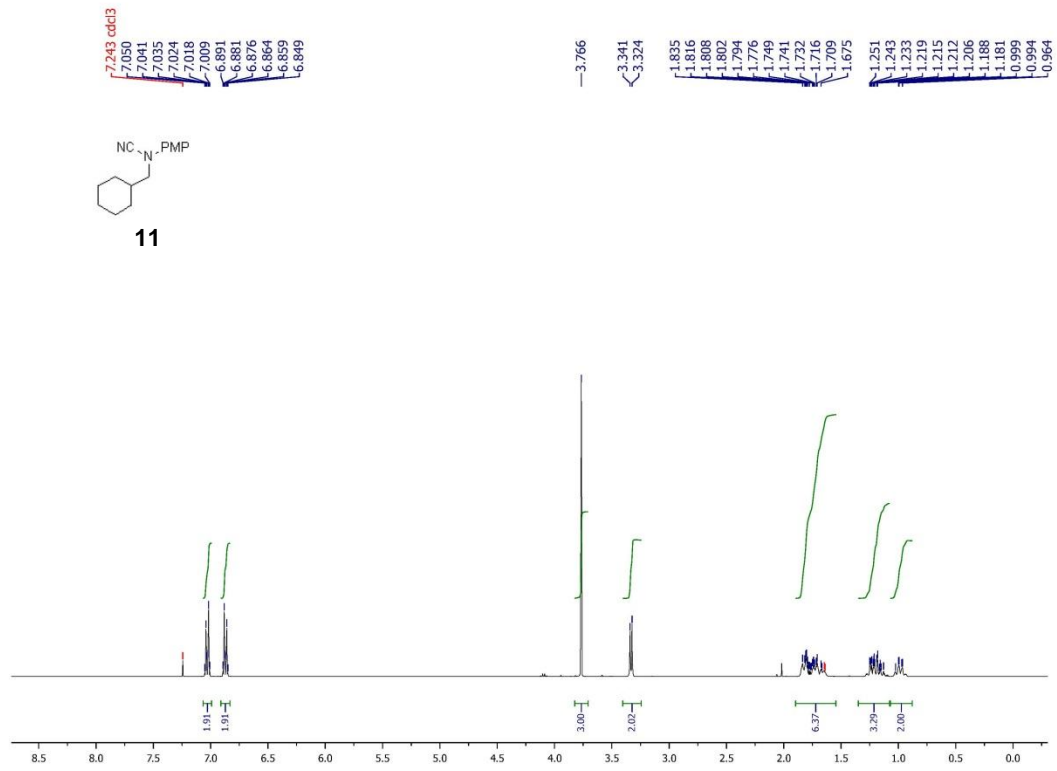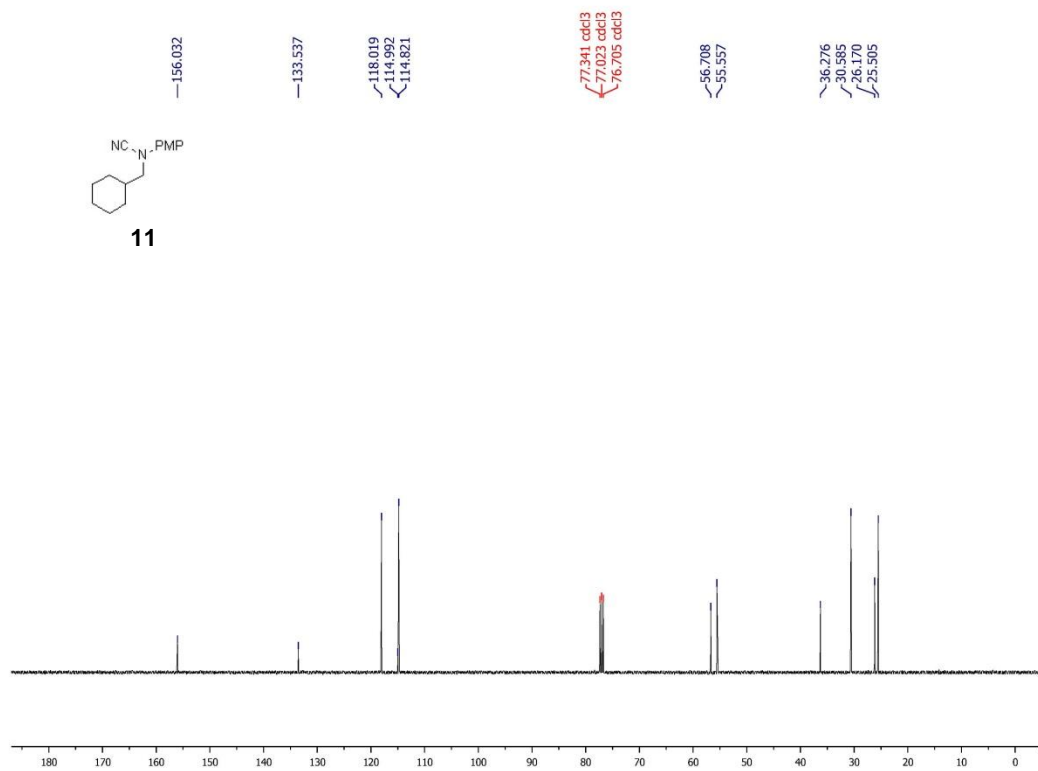

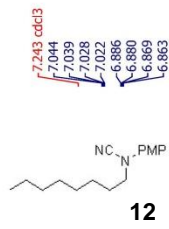

$\delta$  3.769  
 $\delta$  3.489  
 $\delta$  3.481  
 $\delta$  3.462

$\delta$  1.780  
 $\delta$  1.761  
 $\delta$  1.743  
 $\delta$  1.724

$\delta$  1.276  
 $\delta$  1.253  
 $\delta$  1.233  
 $\delta$  1.213  
 $\delta$  0.857  
 $\delta$  0.839

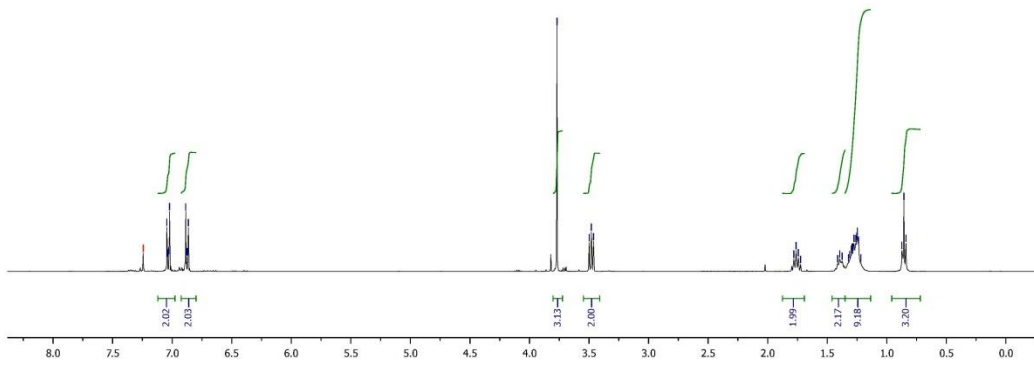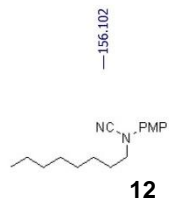

$\delta$  77.335 cdd3  
 $\delta$  77.017 cdd3  
 $\delta$  76.699 cdd3

$\delta$  55.556  
 $\delta$  50.305

$\delta$  31.686  
 $\delta$  29.091  
 $\delta$  29.069  
 $\delta$  27.455  
 $\delta$  26.452  
 $\delta$  22.576  
 $\delta$  14.048

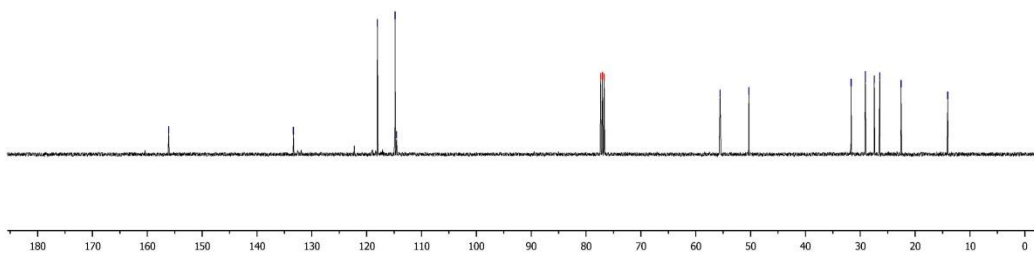

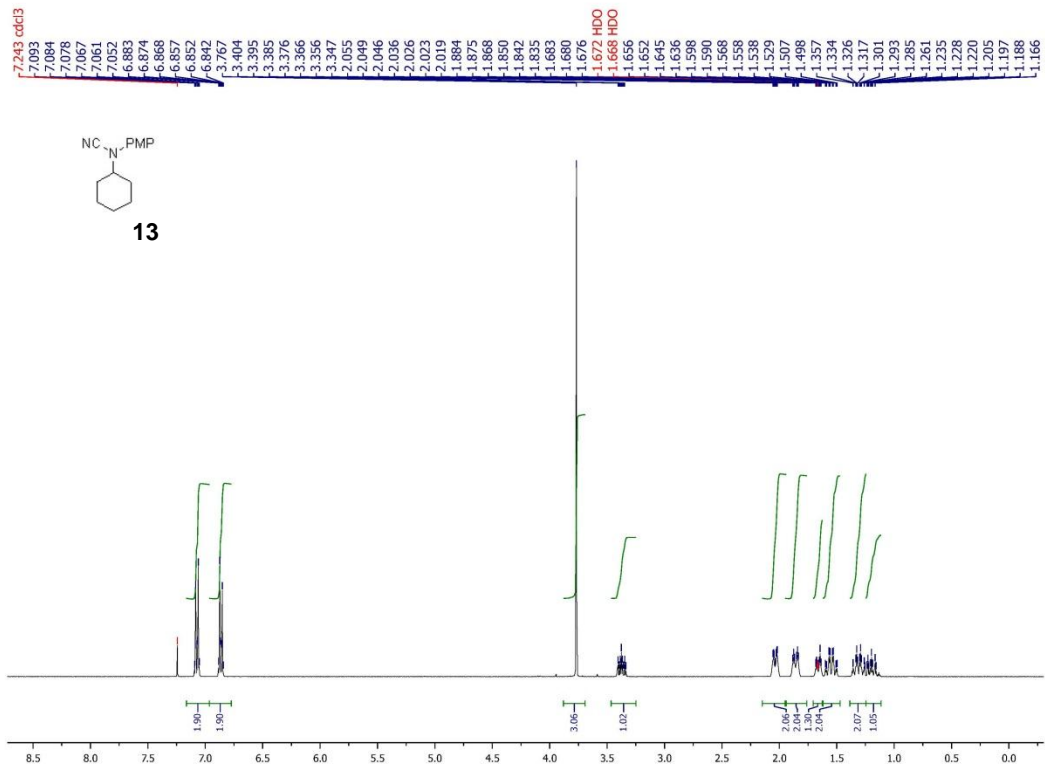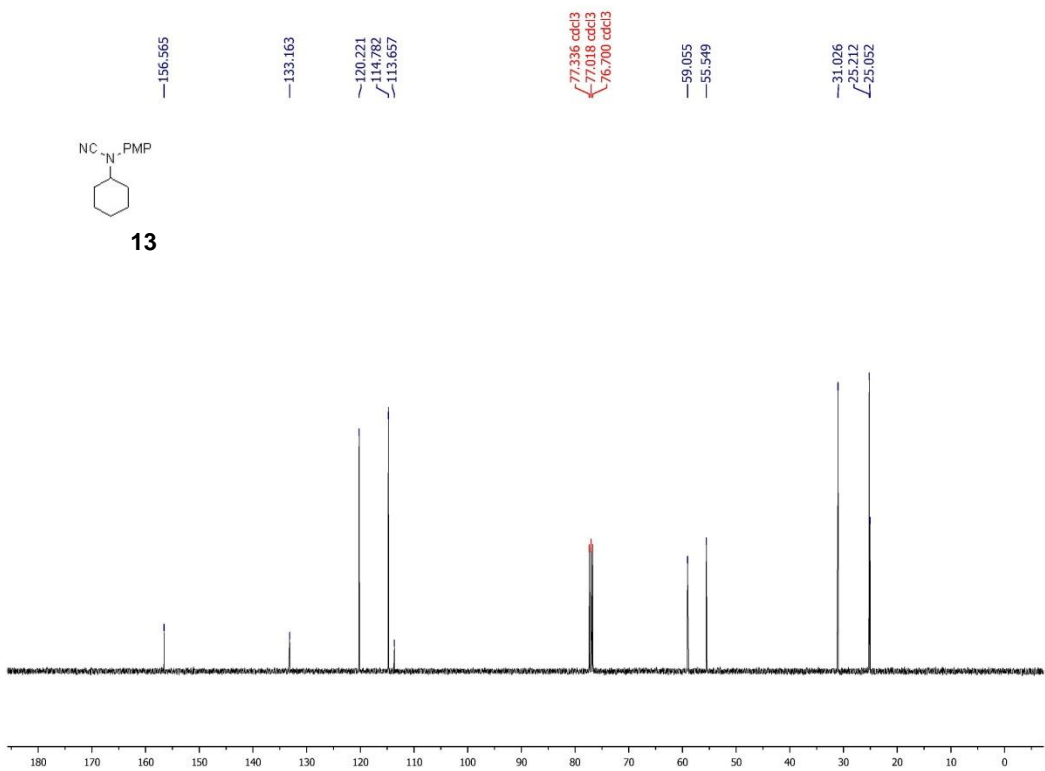



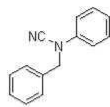

14

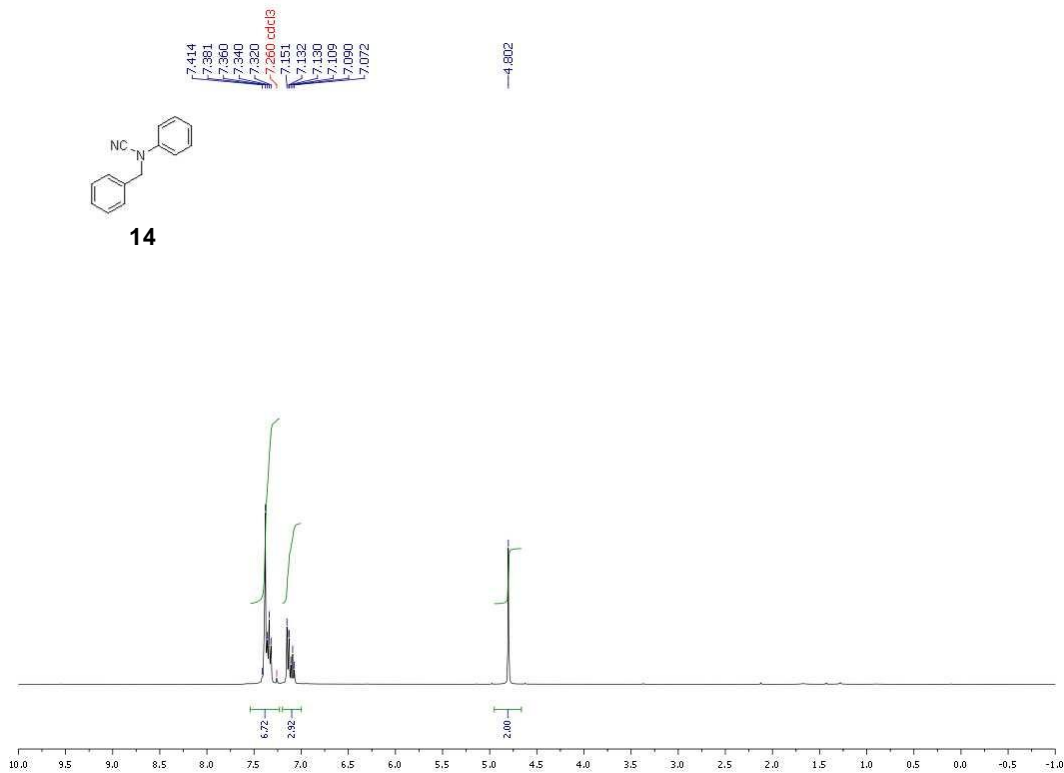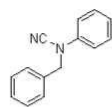

14

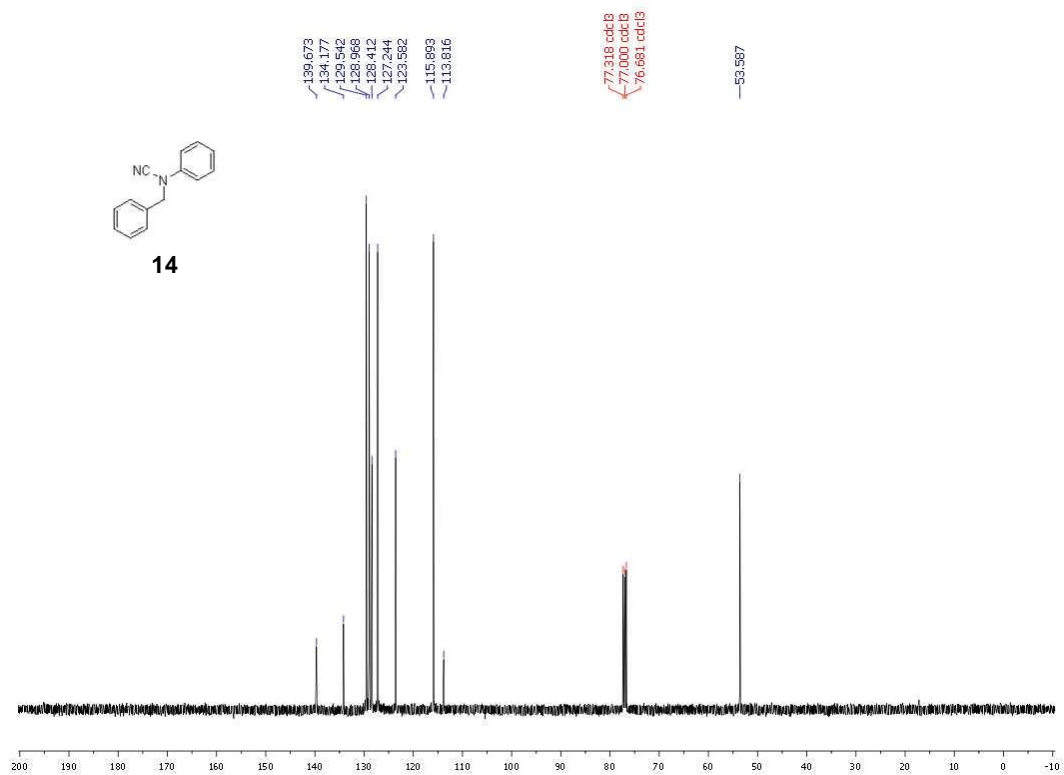

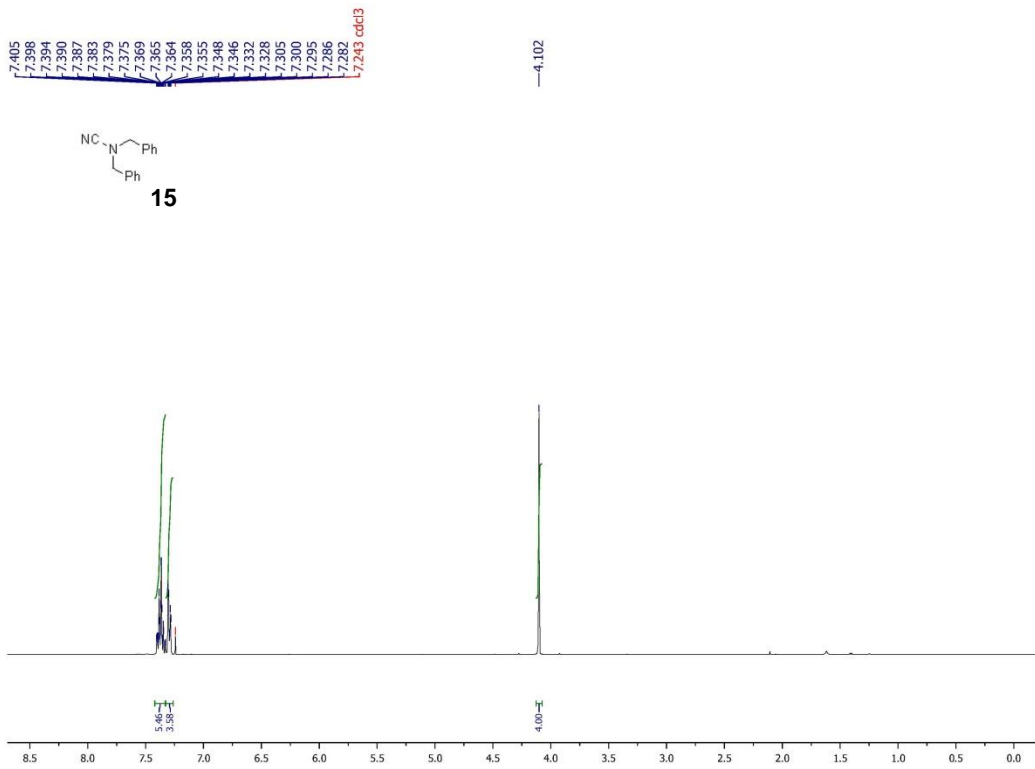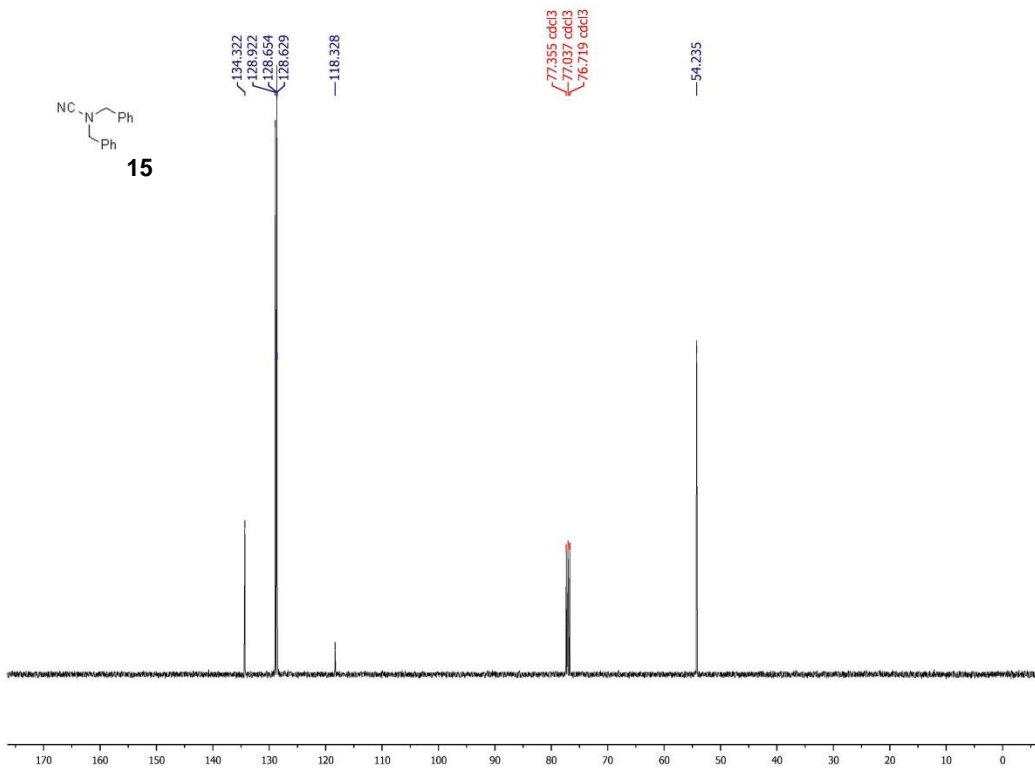

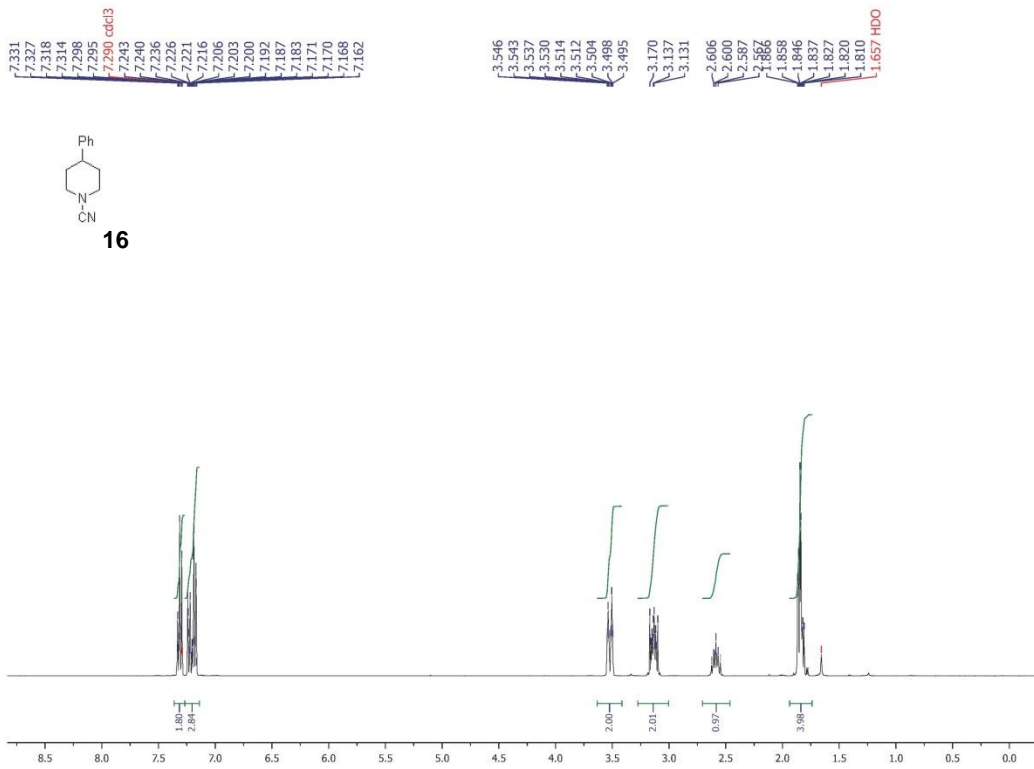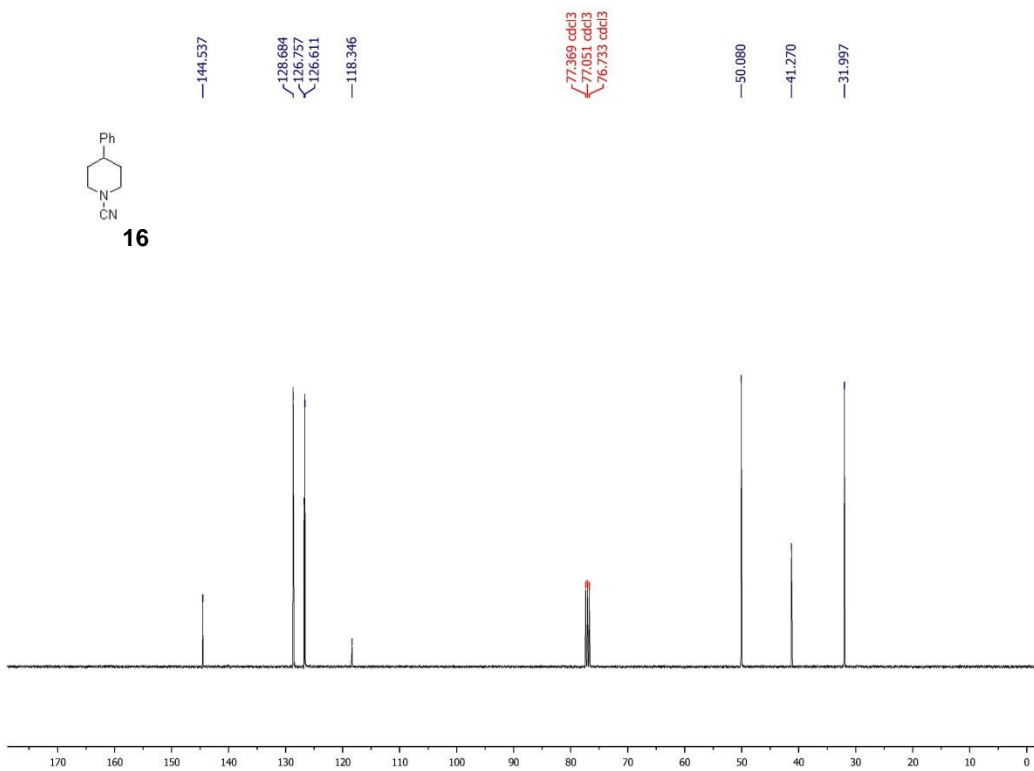

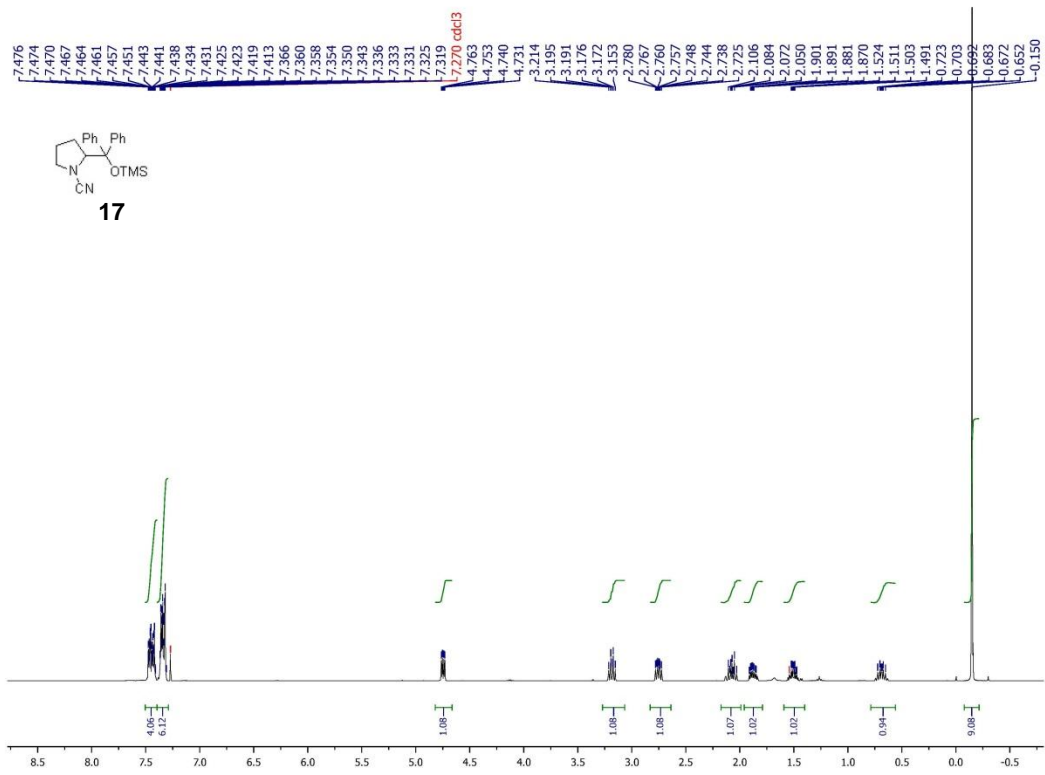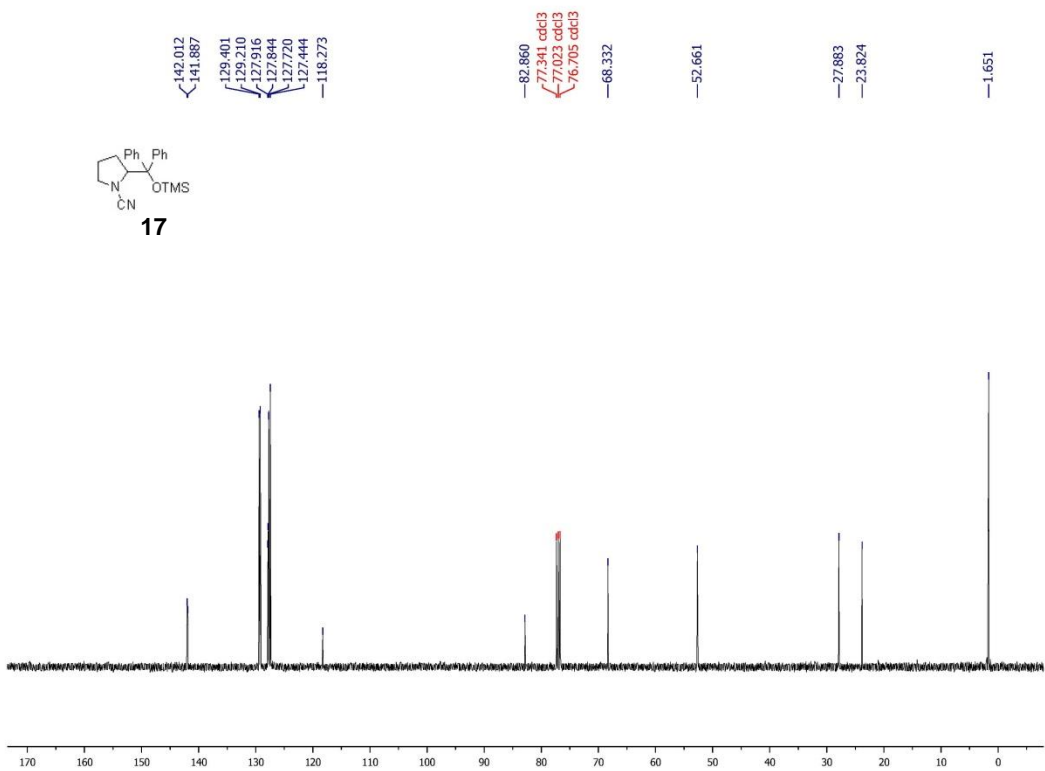

Supplement: NIHMS547516-supplement-1_si_001.pdf [file NIHMS547516-supplement-1_si_001.pdf]
